# Supplementary material for: Seasonal Variation of Antioxidant Capacity, Phenols, Minerals and Essential Oil Components of Sage, Spearmint and Sideritis Plants Grown at Different Altitudes
Source: MDPI journal article supplement (doi:10.3390/agronomy11091766), 2021-09-02
Supplement: s1 [file s1]

## SUPPLEMENTARY MATERIAL

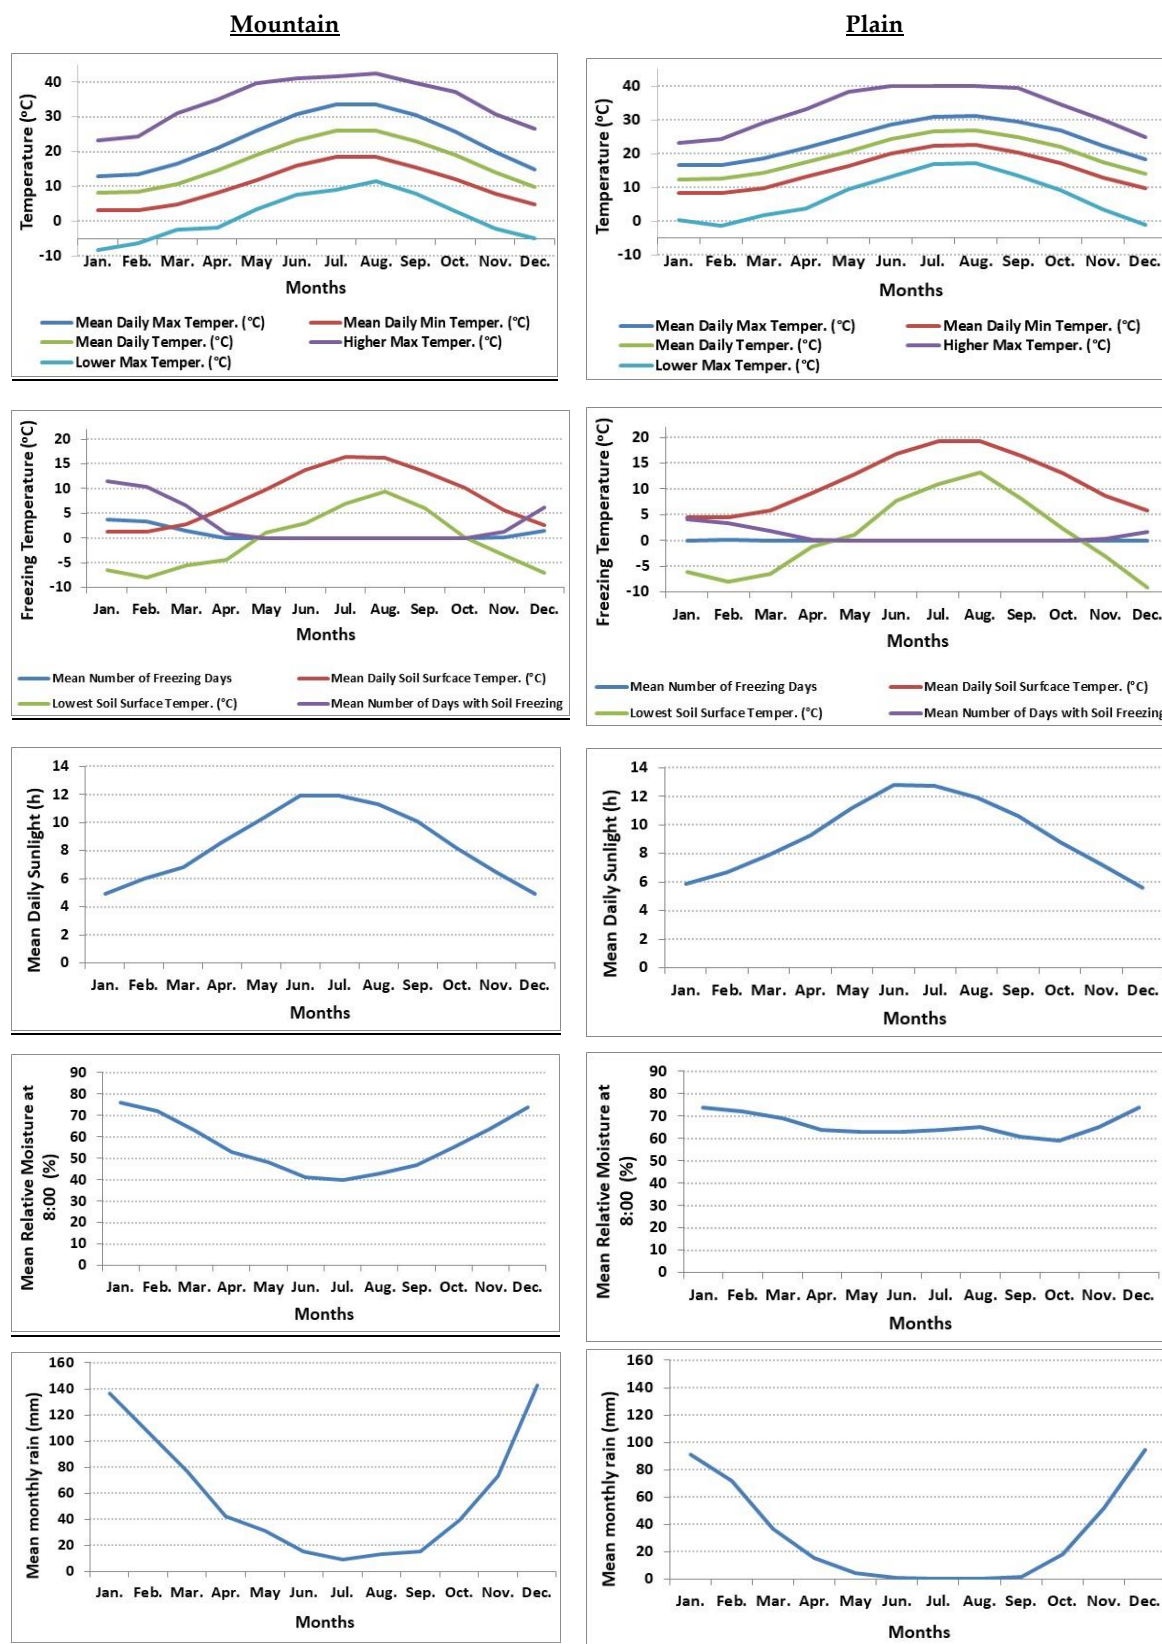

**Figure S1.** Meteorological data of the last 40 years (1972–2012 for the mountain and plain areas of the study. Meteorological data were obtained by the Department of Meteorology of Cyprus.

**Table S1.** Fertilizers and crop protection means applied during the 1 year cultivation period.

|            | Product, Company, Origin                              | Number of Application | Application Mode |
|------------|-------------------------------------------------------|-----------------------|------------------|
| Fertilizer | OASIS BIO (Itapollina Spa, Italy)                     | 8                     | F                |
|            | Fe-Chelate DISPER FER 6% (Disper, Spain)              | 2                     | F                |
|            | KELP-100 (Agrichem, Australia)                        | 3                     | S                |
|            | TRAINER (Itapollina Spa, Italy)                       | 2                     | S                |
| Crop       | KONFLIC (Atlantica Agricola, Spain)                   | 2                     | S                |
| Protection | TRACER (Dow Agrosiences, France)                      | 6                     | S                |
|            | THIOVIT 80 WP (Syngenta Crop protection, Switzerland) | 2                     | S                |
|            | Sulphur Microbagnabile (Solfotecnica, Italy)          | 2                     | F                |

F: indicated fertilizer; S: indicated spraying application

**Table S2.** Correlations coefficients and (*p*-values) between the antioxidant activity and essential oils components of sage.

|                      |                |          | Phenols | FRAP   | ABTS   | N              | K             | P      | Na     | Ca     | Mg             | Fe             | Zn             | Cu             | EO             | Eucalyptol | Camphor | a Thujone |
|----------------------|----------------|----------|---------|--------|--------|----------------|---------------|--------|--------|--------|----------------|----------------|----------------|----------------|----------------|------------|---------|-----------|
| <b>Summer Mount.</b> | <b>Phenols</b> | <i>r</i> | 1       | -0.193 | -0.676 | 0.707          | 0.754         | 0.856  | 0.930  | -0.973 | -0.975         | -0.974         | 0.955          | -0.974         | 0.966          | -0.106     | -0.108  | -0.259    |
|                      |                | <i>p</i> |         | 0.877  | 0.527  | 0.500          | 0.456         | 0.346  | 0.240  | 0.150  | 0.144          | 0.147          | 0.191          | 0.146          | 0.167          | 0.932      | 0.931   | 0.833     |
|                      | <b>FRAP</b>    | <i>r</i> |         | 1      | 0.853  | -0.830         | -0.790        | -0.672 | -0.541 | 0.416  | 0.408          | 0.412          | -0.475         | 0.411          | -0.441         | -0.955     | -0.955  | -0.898    |
|                      |                | <i>p</i> |         |        | 0.349  | 0.376          | 0.420         | 0.531  | 0.636  | 0.727  | 0.732          | 0.730          | 0.685          | 0.730          | 0.710          | 0.191      | 0.192   | 0.290     |
|                      | <b>ABTS</b>    | <i>r</i> |         |        | 1      | <b>-0.999*</b> | -0.994        | -0.960 | -0.900 | 0.829  | 0.824          | 0.827          | -0.864         | 0.826          | -0.844         | -0.661     | -0.660  | -0.536    |
|                      |                | <i>p</i> |         |        |        | 0.027          | 0.071         | 0.181  | 0.287  | 0.378  | 0.383          | 0.380          | 0.336          | 0.381          | 0.360          | 0.541      | 0.541   | 0.640     |
|                      | <b>N</b>       | <i>r</i> |         |        |        | 1              | <b>0.998*</b> | 0.971  | 0.918  | -0.852 | -0.847         | -0.850         | 0.885          | -0.849         | 0.866          | 0.628      | 0.627   | 0.500     |
|                      |                | <i>p</i> |         |        |        |                | 0.044         | 0.154  | 0.260  | 0.351  | 0.356          | 0.354          | 0.309          | 0.354          | 0.333          | 0.568      | 0.568   | 0.667     |
|                      | <b>K</b>       | <i>r</i> |         |        |        |                | 1             | 0.985  | 0.943  | -0.886 | -0.882         | -0.884         | 0.915          | -0.884         | 0.899          | 0.573      | 0.572   | 0.439     |
|                      |                | <i>p</i> |         |        |        |                |               | 0.110  | 0.216  | 0.307  | 0.312          | 0.309          | 0.265          | 0.310          | 0.289          | 0.612      | 0.612   | 0.711     |
|                      | <b>P</b>       | <i>r</i> |         |        |        |                |               | 1      | 0.986  | -0.953 | -0.950         | -0.951         | 0.971          | -0.951         | 0.961          | 0.423      | 0.422   | 0.277     |
|                      |                | <i>p</i> |         |        |        |                |               |        | 0.106  | 0.196  | 0.202          | 0.199          | 0.155          | 0.199          | 0.179          | 0.722      | 0.723   | 0.821     |
|                      | <b>Na</b>      | <i>r</i> |         |        |        |                |               |        | 1      | -0.990 | -0.989         | -0.989         | <b>0.997*</b>  | -0.989         | 0.993          | 0.267      | 0.266   | 0.115     |
|                      |                | <i>p</i> |         |        |        |                |               |        |        | 0.091  | 0.096          | 0.093          | 0.049          | 0.094          | 0.073          | 0.828      | 0.829   | 0.927     |
|                      | <b>Ca</b>      | <i>r</i> |         |        |        |                |               |        |        | 1      | <b>1.000**</b> | <b>1.000**</b> | <b>-0.998*</b> | <b>1.000**</b> | <b>-1.000*</b> | -0.128     | -0.127  | 0.027     |
|                      |                | <i>p</i> |         |        |        |                |               |        |        |        | 0.005          | 0.003          | 0.042          | 0.003          | 0.017          | 0.918      | 0.919   | 0.983     |
|                      | <b>Mg</b>      | <i>r</i> |         |        |        |                |               |        |        |        | 1              | <b>1.000**</b> | <b>-0.997*</b> | <b>1.000**</b> | <b>-0.999*</b> | -0.119     | -0.118  | 0.036     |
|                      |                | <i>p</i> |         |        |        |                |               |        |        |        |                | 0.003          | 0.047          | 0.002          | 0.023          | 0.924      | 0.925   | 0.977     |
|                      | <b>Fe</b>      | <i>r</i> |         |        |        |                |               |        |        |        |                | 1              | <b>-0.998*</b> | <b>1.000**</b> | <b>-0.999*</b> | -0.124     | -0.122  | 0.032     |
|                      |                | <i>p</i> |         |        |        |                |               |        |        |        |                |                | 0.045          | 0.000          | 0.020          | 0.921      | 0.922   | 0.980     |
|                      | <b>Zn</b>      | <i>r</i> |         |        |        |                |               |        |        |        |                |                | 1              | <b>-0.998*</b> | <b>0.999*</b>  | 0.193      | 0.191   | 0.038     |
|                      |                | <i>p</i> |         |        |        |                |               |        |        |        |                |                |                | 0.045          | 0.024          | 0.877      | 0.877   | 0.976     |
|                      | <b>Cu</b>      | <i>r</i> |         |        |        |                |               |        |        |        |                |                |                | 1              | <b>-0.999*</b> | -0.123     | -0.122  | 0.032     |
|                      |                | <i>p</i> |         |        |        |                |               |        |        |        |                |                |                |                | 0.021          | 0.921      | 0.922   | 0.979     |
|                      | <b>EO</b>      | <i>r</i> |         |        |        |                |               |        |        |        |                |                |                |                | 1              | 0.155      | 0.154   | 0.000     |

|        |         | <i>p</i> |   |         |         |         |         |         |         |         |         |        |        |        |        | 0.901 | 0.902 | 1.000 |
|--------|---------|----------|---|---------|---------|---------|---------|---------|---------|---------|---------|--------|--------|--------|--------|-------|-------|-------|
| Autumn | Phenols | <i>r</i> | 1 | 0.922   | 0.969   | 0.888   | -0.772  | -0.843  | -0.843  | -0.841  | 0.863   | 0.859  | -0.825 | -0.774 | 0.852  | 0.662 | 0.664 | 0.662 |
| Mount. |         | <i>p</i> |   | 0.253   | 0.158   | 0.305   | 0.439   | 0.362   | 0.362   | 0.364   | 0.337   | 0.343  | 0.382  | 0.437  | 0.351  | 0.539 | 0.538 | 0.539 |
|        | FRAP    | <i>r</i> | 1 | 0.989   | 0.640   | -0.958  | -0.985  | -0.985  | -0.985  | 0.991   | 0.990   | -0.979 | -0.959 | 0.988  | 0.321  | 0.323 | 0.321 |       |
|        |         | <i>p</i> |   | 0.095   | 0.558   | 0.186   | 0.109   | 0.109   | 0.111   | 0.084   | 0.090   | 0.129  | 0.184  | 0.098  | 0.792  | 0.791 | 0.792 |       |
|        | ABTS    | <i>r</i> | 1 | 0.747   | -0.905  | -0.949  | -0.949  | -0.948  | 0.961   | 0.958   | -0.939  | -0.906 | 0.955  | 0.457  | 0.459  | 0.458 |       |       |
|        |         | <i>p</i> |   | 0.463   | 0.280   | 0.203   | 0.203   | 0.206   | 0.179   | 0.184   | 0.224   | 0.278  | 0.192  | 0.698  | 0.696  | 0.697 |       |       |
|        | N       | <i>r</i> | 1 | -0.392  | -0.500  | -0.500  | -0.497  | 0.533   | 0.526   | -0.472  | -0.395  | 0.515  | 0.933  | 0.934  | 0.933  |       |       |       |
|        |         | <i>p</i> |   | 0.744   | 0.667   | 0.667   | 0.669   | 0.642   | 0.647   | 0.687   | 0.742   | 0.656  | 0.234  | 0.233  | 0.234  |       |       |       |
|        | K       | <i>r</i> | 1 | 0.993   | 0.993   | 0.993   | 0.993   | -0.987  | -0.989  | 0.996   | 1.000** | -0.990 | -0.035 | -0.037 | -0.035 |       |       |       |
|        |         | <i>p</i> |   | 0.077   | 0.077   | 0.074   | 0.101   | 0.096   | 0.056   | 0.002   | 0.088   | 0.978  | 0.977  | 0.978  |        |       |       |       |
|        | P       | <i>r</i> | 1 | 1.000** | 1.000** | -0.999* | -1.000* | 0.999*  | 0.993   | -1.000* | -0.155  | -0.157 | -0.155 |        |        |       |       |       |
|        |         | <i>p</i> |   | 0.000   | 0.003   | 0.024   | 0.019   | 0.021   | 0.075   | 0.011   | 0.901   | 0.900  | 0.901  |        |        |       |       |       |
|        | Na      | <i>r</i> | 1 | 1.000** | -0.999* | -1.000* | 0.999*  | 0.993   | -1.000* | -0.155  | -0.157  | -0.155 |        |        |        |       |       |       |
|        |         | <i>p</i> |   | 0.003   | 0.024   | 0.019   | 0.021   | 0.075   | 0.011   | 0.901   | 0.900   | 0.901  |        |        |        |       |       |       |
|        | Ca      | <i>r</i> | 1 | -0.999* | -0.999* | 1.000*  | 0.994   | -1.000* | -0.151  | -0.153  | -0.151  |        |        |        |        |       |       |       |
|        |         | <i>p</i> |   | 0.027   | 0.022   | 0.018   | 0.073   | 0.014   | 0.904   | 0.902   | 0.903   |        |        |        |        |       |       |       |
|        | Mg      | <i>r</i> | 1 | 1.000** | -0.998* | -0.988  | 1.000*  | 0.193   | 0.195   | 0.193   |         |        |        |        |        |       |       |       |
|        |         | <i>p</i> |   | 0.005   | 0.045   | 0.100   | 0.013   | 0.877   | 0.875   | 0.876   |         |        |        |        |        |       |       |       |
|        | Fe      | <i>r</i> | 1 | -0.998* | -0.989  | 1.000** | 0.185   | 0.187   | 0.185   |         |         |        |        |        |        |       |       |       |
|        |         | <i>p</i> |   | 0.040   | 0.094   | 0.008   | 0.882   | 0.880   | 0.882   |         |         |        |        |        |        |       |       |       |
|        | Zn      | <i>r</i> | 1 | 0.996   | -0.999* | -0.123  | -0.125  | -0.123  |         |         |         |        |        |        |        |       |       |       |
|        |         | <i>p</i> |   | 0.055   | 0.032   | 0.922   | 0.920   | 0.921   |         |         |         |        |        |        |        |       |       |       |
|        | Cu      | <i>r</i> | 1 | -0.991  | -0.038  | -0.040  | -0.038  |         |         |         |         |        |        |        |        |       |       |       |
|        |         | <i>p</i> |   | 0.086   | 0.976   | 0.975   | 0.976   |         |         |         |         |        |        |        |        |       |       |       |
|        | EO      | <i>r</i> | 1 | 0.172   | 0.174   | 0.172   |         |         |         |         |         |        |        |        |        |       |       |       |
|        |         | <i>p</i> |   | 0.890   | 0.889   | 0.890   |         |         |         |         |         |        |        |        |        |       |       |       |

|        |         |          |          |       |               |       |        |               |        |                |        |                |                |                |                 |                |                 |        |        |        |
|--------|---------|----------|----------|-------|---------------|-------|--------|---------------|--------|----------------|--------|----------------|----------------|----------------|-----------------|----------------|-----------------|--------|--------|--------|
| Winter | Phenols | <i>r</i> | 1        | 0.956 | <b>0.999*</b> | 0.741 | -0.576 | -0.589        | 0.914  | -0.564         | -0.493 | 0.627          | -0.584         | -0.577         | 0.589           | 0.889          | 0.888           | 0.889  |        |        |
| Mount. |         | <i>p</i> |          | 0.189 | 0.033         | 0.468 | 0.609  | 0.599         | 0.266  | 0.618          | 0.672  | 0.569          | 0.603          | 0.608          | 0.599           | 0.303          | 0.304           | 0.302  |        |        |
|        | FRAP    | <i>r</i> |          | 1     | 0.940         | 0.905 | -0.790 | -0.799        | 0.993  | -0.781         | -0.725 | 0.827          | -0.796         | -0.790         | 0.799           | 0.716          | 0.716           | 0.717  |        |        |
|        |         | <i>p</i> |          |       | 0.222         | 0.280 | 0.420  | 0.410         | 0.077  | 0.430          | 0.483  | 0.380          | 0.414          | 0.420          | 0.410           | 0.492          | 0.492           | 0.491  |        |        |
|        | ABTS    | <i>r</i> |          |       | 1             | 0.705 | -0.533 | -0.546        | 0.892  | -0.520         | -0.446 | 0.585          | -0.540         | -0.533         | 0.546           | 0.911          | 0.911           | 0.912  |        |        |
|        |         | <i>p</i> |          |       |               | 0.502 | 0.642  | 0.632         | 0.299  | 0.652          | 0.705  | 0.602          | 0.636          | 0.642          | 0.632           | 0.270          | 0.270           | 0.269  |        |        |
|        | N       | <i>r</i> |          |       |               | 1     | -0.976 | -0.979        | 0.950  | -0.972         | -0.949 | 0.988          | -0.978         | -0.976         | 0.979           | 0.351          | 0.350           | 0.352  |        |        |
|        |         | <i>p</i> |          |       |               |       | 0.141  | 0.130         | 0.203  | 0.150          | 0.204  | 0.101          | 0.135          | 0.140          | 0.130           | 0.772          | 0.772           | 0.771  |        |        |
|        | K       | <i>r</i> |          |       |               |       | 1      | <b>1.000*</b> | -0.858 | <b>1.000**</b> | 0.995  | <b>-0.998*</b> | <b>1.000**</b> | <b>1.000**</b> | <b>-1.000*</b>  | -0.137         | -0.137          | -0.139 |        |        |
|        |         | <i>p</i> |          |       |               |       |        | 0.010         | 0.343  | 0.009          | 0.063  | 0.040          | 0.006          | 0.001          | 0.010           | 0.912          | 0.913           | 0.911  |        |        |
|        | P       | <i>r</i> |          |       |               |       |        | 1             | -0.866 | <b>1.000*</b>  | 0.993  | <b>-0.999*</b> | <b>1.000**</b> | <b>1.000**</b> | <b>-1.000**</b> | -0.153         | -0.153          | -0.155 |        |        |
|        |         | <i>p</i> |          |       |               |       |        |               | 0.333  | 0.019          | 0.073  | 0.030          | 0.004          | 0.009          | 0.000           | 0.902          | 0.903           | 0.901  |        |        |
|        | Na      | <i>r</i> |          |       |               |       |        |               | 1      | -0.850         | -0.803 | 0.889          | -0.863         | -0.858         | 0.866           | 0.627          | 0.626           | 0.628  |        |        |
|        |         | <i>p</i> |          |       |               |       |        |               |        | 0.353          | 0.407  | 0.303          | 0.338          | 0.343          | 0.333           | 0.569          | 0.569           | 0.568  |        |        |
|        | Ca      | <i>r</i> |          |       |               |       |        |               |        | 1              | 0.996  | <b>-0.997*</b> | <b>1.000*</b>  | <b>1.000**</b> | <b>-1.000*</b>  | -0.123         | -0.122          | -0.125 |        |        |
|        |         | <i>p</i> |          |       |               |       |        |               |        |                | 0.054  | 0.049          | 0.015          | 0.010          | 0.019           | 0.922          | 0.922           | 0.920  |        |        |
|        | Mg      | <i>r</i> |          |       |               |       |        |               |        |                |        | 1              | -0.987         | 0.994          | 0.995           | -0.993         | -0.039          | -0.038 | -0.040 |        |
|        |         | <i>p</i> |          |       |               |       |        |               |        |                |        |                | 0.103          | 0.069          | 0.064           | 0.073          | 0.975           | 0.976  | 0.974  |        |
|        | Fe      | <i>r</i> |          |       |               |       |        |               |        |                |        |                |                | 1              | <b>-0.999*</b>  | <b>-0.998*</b> | <b>0.999*</b>   | 0.199  | 0.199  | 0.201  |
|        |         | <i>p</i> |          |       |               |       |        |               |        |                |        |                |                |                | 0.034           | 0.039          | 0.030           | 0.872  | 0.873  | 0.871  |
|        | Zn      | <i>r</i> |          |       |               |       |        |               |        |                |        |                |                |                | 1               | <b>1.000**</b> | <b>-1.000**</b> | -0.146 | -0.146 | -0.148 |
|        |         | <i>p</i> |          |       |               |       |        |               |        |                |        |                |                |                |                 | 0.005          | 0.004           | 0.906  | 0.907  | 0.905  |
|        | Cu      | <i>r</i> |          |       |               |       |        |               |        |                |        |                |                |                |                 | 1              | <b>-1.000**</b> | -0.138 | -0.138 | -0.140 |
|        |         | <i>p</i> |          |       |               |       |        |               |        |                |        |                |                |                |                 |                | 0.009           | 0.912  | 0.912  | 0.911  |
|        | EO      | <i>r</i> |          |       |               |       |        |               |        |                |        |                |                |                |                 |                | 1               | 0.153  | 0.153  | 0.155  |
|        |         | <i>p</i> |          |       |               |       |        |               |        |                |        |                |                |                |                 |                |                 | 0.902  | 0.903  | 0.901  |
|        |         | Phenols  | <i>r</i> | 1     | 0.248         | 0.827 | 0.411  | -0.573        | 0.300  | . <sup>a</sup> | 0.461  | -0.616         | -0.503         | -0.486         | 0.469           | 0.451          | -0.997          | -0.996 | -0.996 |        |

|        |         |          |  |       |       |        |        |               |                |                |                |                |                |                |                |                |                |                |        |
|--------|---------|----------|--|-------|-------|--------|--------|---------------|----------------|----------------|----------------|----------------|----------------|----------------|----------------|----------------|----------------|----------------|--------|
| Spring |         | <i>p</i> |  | 0.841 | 0.380 | 0.731  | 0.612  | 0.806         |                | 0.695          | 0.578          | 0.664          | 0.677          | 0.689          | 0.702          | 0.052          | 0.056          | 0.055          |        |
| Mount. | FRAP    | <i>r</i> |  | 1     | 0.749 | 0.985  | -0.936 | <b>0.999*</b> | . <sup>a</sup> | 0.974          | -0.916         | -0.962         | -0.967         | 0.972          | 0.976          | -0.325         | -0.332         | -0.331         |        |
|        |         | <i>p</i> |  |       | 0.461 | 0.110  | 0.229  | 0.035         |                | 0.145          | 0.263          | 0.176          | 0.163          | 0.151          | 0.138          | 0.789          | 0.785          | 0.786          |        |
|        | ABTS    | <i>r</i> |  |       | 1     | 0.852  | -0.934 | 0.784         | . <sup>a</sup> | 0.880          | -0.952         | -0.902         | -0.893         | 0.884          | 0.874          | -0.870         | -0.874         | -0.873         |        |
|        |         | <i>p</i> |  |       |       | 0.351  | 0.232  | 0.426         |                | 0.316          | 0.198          | 0.285          | 0.298          | 0.310          | 0.323          | 0.328          | 0.324          | 0.324          |        |
|        | N       | <i>r</i> |  |       |       | 1      | -0.983 | 0.993         | . <sup>a</sup> | <b>0.998*</b>  | -0.971         | -0.995         | -0.996         | <b>0.998*</b>  | <b>0.999*</b>  | -0.483         | -0.489         | -0.488         |        |
|        |         | <i>p</i> |  |       |       |        | 0.119  | 0.075         |                | 0.035          | 0.153          | 0.066          | 0.053          | 0.041          | 0.028          | 0.679          | 0.675          | 0.676          |        |
|        | K       | <i>r</i> |  |       |       |        | 1      | -0.954        | . <sup>a</sup> | -0.991         | <b>0.999*</b>  | 0.997          | 0.995          | -0.993         | -0.990         | 0.637          | 0.643          | 0.642          |        |
|        |         | <i>p</i> |  |       |       |        |        | 0.194         |                | 0.084          | 0.034          | 0.053          | 0.066          | 0.078          | 0.091          | 0.560          | 0.556          | 0.556          |        |
|        | P       | <i>r</i> |  |       |       |        |        | 1             | . <sup>a</sup> | 0.985          | -0.936         | -0.975         | -0.980         | 0.983          | 0.987          | -0.377         | -0.383         | -0.382         |        |
|        |         | <i>p</i> |  |       |       |        |        |               |                | 0.111          | 0.228          | 0.142          | 0.129          | 0.117          | 0.104          | 0.754          | 0.750          | 0.751          |        |
|        | Na      | <i>r</i> |  |       |       |        |        |               | . <sup>a</sup> |        |
|        |         | <i>p</i> |  |       |       |        |        |               |                |                |                |                |                |                |                |                |                |                |        |
|        | Ca      | <i>r</i> |  |       |       |        |        |               |                | 1              | -0.983         | <b>-0.999*</b> | <b>-1.000*</b> | <b>1.000**</b> | <b>1.000**</b> | -0.531         | -0.537         | -0.536         |        |
|        |         | <i>p</i> |  |       |       |        |        |               |                |                | 0.118          | 0.031          | 0.018          | 0.006          | 0.007          | 0.644          | 0.639          | 0.640          |        |
|        | Mg      | <i>r</i> |  |       |       |        |        |               |                |                | 1              | 0.991          | 0.988          | -0.985         | -0.981         | 0.678          | 0.683          | 0.682          |        |
|        |         | <i>p</i> |  |       |       |        |        |               |                |                |                | 0.087          | 0.100          | 0.112          | 0.125          | 0.526          | 0.522          | 0.523          |        |
|        | Fe      | <i>r</i> |  |       |       |        |        |               |                |                |                | 1              | <b>1.000*</b>  | <b>-0.999*</b> | <b>-0.998*</b> | 0.572          | 0.577          | 0.576          |        |
|        |         | <i>p</i> |  |       |       |        |        |               |                |                |                |                | 0.013          | 0.025          | 0.038          | 0.613          | 0.608          | 0.609          |        |
|        | Zn      | <i>r</i> |  |       |       |        |        |               |                |                |                |                | 1              | <b>-1.000*</b> | <b>-0.999*</b> | 0.555          | 0.560          | 0.559          |        |
|        |         | <i>p</i> |  |       |       |        |        |               |                |                |                |                |                | 0.012          | 0.025          | 0.626          | 0.621          | 0.622          |        |
|        | Cu      | <i>r</i> |  |       |       |        |        |               |                |                |                |                |                | 1              | <b>1.000*</b>  | -0.539         | -0.545         | -0.544         |        |
|        |         | <i>p</i> |  |       |       |        |        |               |                |                |                |                |                |                | 0.013          | 0.638          | 0.633          | 0.634          |        |
|        | EO      | <i>r</i> |  |       |       |        |        |               |                |                |                |                |                |                | 1              | -0.522         | -0.528         | -0.526         |        |
|        |         | <i>p</i> |  |       |       |        |        |               |                |                |                |                |                |                |                | 0.651          | 0.646          | 0.647          |        |
|        | Phenols | <i>r</i> |  | 1     | 0.993 | -0.134 | -0.290 | 0.165         | 0.130          | -0.682         | 0.212          | -0.242         | -0.261         | 0.218          | 0.166          | -0.225         | <b>-0.998*</b> | <b>-0.998*</b> | -0.974 |

|        |          |          |   |       |               |        |        |               |        |               |                |                |                |                |                 |        |        |        |
|--------|----------|----------|---|-------|---------------|--------|--------|---------------|--------|---------------|----------------|----------------|----------------|----------------|-----------------|--------|--------|--------|
| Summer |          | <i>p</i> |   | 0.077 | 0.914         | 0.813  | 0.895  | 0.917         | 0.522  | 0.864         | 0.845          | 0.832          | 0.860          | 0.894          | 0.856           | 0.044  | 0.045  | 0.144  |
| Plain  | FRAP     | <i>r</i> |   | 1     | -0.014        | -0.403 | 0.283  | 0.249         | -0.765 | 0.329         | -0.357         | -0.375         | 0.334          | 0.284          | -0.341          | -0.982 | -0.982 | -0.940 |
|        |          | <i>p</i> |   |       | 0.991         | 0.736  | 0.817  | 0.840         | 0.445  | 0.787         | 0.767          | 0.755          | 0.783          | 0.816          | 0.779           | 0.121  | 0.122  | 0.221  |
|        | ABTS     | <i>r</i> |   |       | 1             | -0.910 | 0.955  | 0.965         | -0.633 | 0.940         | -0.929         | -0.922         | 0.938          | 0.955          | -0.935          | 0.202  | 0.204  | 0.354  |
|        |          | <i>p</i> |   |       |               | 0.273  | 0.191  | 0.169         | 0.563  | 0.222         | 0.241          | 0.254          | 0.226          | 0.192          | 0.230           | 0.870  | 0.869  | 0.770  |
|        | N        | <i>r</i> |   |       |               | 1      | -0.992 | -0.987        | 0.898  | -0.997        | <b>0.999*</b>  | <b>1.000*</b>  | <b>-0.997*</b> | -0.992         | <b>0.998*</b>   | 0.223  | 0.221  | 0.067  |
|        |          | <i>p</i> |   |       |               |        | 0.082  | 0.104         | 0.291  | 0.051         | 0.032          | 0.019          | 0.047          | 0.081          | 0.043           | 0.857  | 0.858  | 0.957  |
|        | K        | <i>r</i> |   |       |               |        | 1      | <b>0.999*</b> | -0.834 | <b>0.999*</b> | -0.997         | -0.995         | <b>0.999*</b>  | <b>1.000**</b> | <b>-0.998*</b>  | -0.096 | -0.095 | 0.061  |
|        |          | <i>p</i> |   |       |               |        |        | 0.022         | 0.372  | 0.031         | 0.050          | 0.062          | 0.035          | 0.001          | 0.039           | 0.939  | 0.939  | 0.961  |
|        | P        | <i>r</i> |   |       |               |        |        | 1             | -0.814 | 0.997         | -0.994         | -0.991         | 0.996          | <b>0.999*</b>  | -0.995          | -0.062 | -0.060 | 0.096  |
|        |          | <i>p</i> |   |       |               |        |        |               | 0.394  | 0.053         | 0.072          | 0.085          | 0.057          | 0.023          | 0.061           | 0.961  | 0.962  | 0.939  |
|        | Na       | <i>r</i> |   |       |               |        |        |               | 1      | -0.859        | 0.875          | 0.884          | -0.863         | -0.835         | 0.866           | 0.630  | 0.629  | 0.500  |
|        |          | <i>p</i> |   |       |               |        |        |               |        | 0.342         | 0.322          | 0.310          | 0.338          | 0.371          | 0.333           | 0.566  | 0.567  | 0.667  |
|        | Ca       | <i>r</i> |   |       |               |        |        |               |        | 1             | <b>-1.000*</b> | <b>-0.999*</b> | <b>1.000**</b> | <b>0.999*</b>  | <b>-1.000**</b> | -0.144 | -0.143 | 0.013  |
|        |          | <i>p</i> |   |       |               |        |        |               |        |               | 0.019          | 0.032          | 0.004          | 0.030          | 0.008           | 0.908  | 0.909  | 0.992  |
|        | Mg       | <i>r</i> |   |       |               |        |        |               |        |               | 1              | <b>1.000*</b>  | <b>-1.000*</b> | <b>-0.997*</b> | <b>1.000*</b>   | 0.174  | 0.173  | 0.017  |
|        |          | <i>p</i> |   |       |               |        |        |               |        |               |                | 0.012          | 0.015          | 0.049          | 0.011           | 0.889  | 0.889  | 0.989  |
|        | Fe       | <i>r</i> |   |       |               |        |        |               |        |               |                | 1              | <b>-0.999*</b> | -0.995         | <b>0.999*</b>   | 0.193  | 0.192  | 0.037  |
|        |          | <i>p</i> |   |       |               |        |        |               |        |               |                |                | 0.028          | 0.061          | 0.023           | 0.876  | 0.877  | 0.977  |
|        | Zn       | <i>r</i> |   |       |               |        |        |               |        |               |                |                | 1              | <b>0.999*</b>  | <b>-1.000**</b> | -0.150 | -0.149 | 0.007  |
|        |          | <i>p</i> |   |       |               |        |        |               |        |               |                |                |                | 0.034          | 0.004           | 0.904  | 0.905  | 0.996  |
| Cu     | <i>r</i> |          |   |       |               |        |        |               |        |               |                |                | 1              | <b>-0.998*</b> | -0.098          | -0.097 | 0.059  |        |
|        | <i>p</i> |          |   |       |               |        |        |               |        |               |                |                |                | 0.038          | 0.938           | 0.938  | 0.962  |        |
| EO     | <i>r</i> |          |   |       |               |        |        |               |        |               |                |                |                | 1              | 0.157           | 0.156  | 0.000  |        |
|        | <i>p</i> |          |   |       |               |        |        |               |        |               |                |                |                |                | 0.900           | 0.901  | 1.000  |        |
| Autumn | Phenols  | <i>r</i> | 1 | 0.968 | <b>0.998*</b> | -0.909 | -0.887 | -0.840        | -0.860 | 0.819         | -0.912         | -0.856         | -0.846         | -0.845         | -0.835          | -0.666 | -0.666 | -0.663 |
| Plain  |          | <i>p</i> |   | 0.163 | 0.040         | 0.274  | 0.306  | 0.365         | 0.341  | 0.389         | 0.269          | 0.345          | 0.358          | 0.359          | 0.371           | 0.536  | 0.536  | 0.539  |

|        |         |          |   |                |                |                |                |                |                |                |                |        |        |        |        |        |        |       |
|--------|---------|----------|---|----------------|----------------|----------------|----------------|----------------|----------------|----------------|----------------|--------|--------|--------|--------|--------|--------|-------|
|        | FRAP    | <i>r</i> | 1 | 0.982          | -0.985         | -0.975         | -0.950         | -0.961         | 0.937          | -0.986         | -0.959         | -0.953 | -0.953 | -0.947 | -0.456 | -0.456 | -0.452 |       |
|        |         | <i>p</i> |   | 0.122          | 0.111          | 0.143          | 0.203          | 0.178          | 0.227          | 0.107          | 0.183          | 0.196  | 0.197  | 0.208  | 0.698  | 0.698  | 0.701  |       |
|        | ABTS    | <i>r</i> | 1 | -0.933         | -0.914         | -0.873         | -0.891         | 0.853          | -0.936         | -0.887         | -0.878         | -0.877 | -0.868 | -0.618 | -0.618 | -0.614 |        |       |
|        |         | <i>p</i> |   | 0.234          | 0.266          | 0.325          | 0.300          | 0.349          | 0.229          | 0.305          | 0.318          | 0.319  | 0.330  | 0.576  | 0.576  | 0.579  |        |       |
|        | N       | <i>r</i> | 1 | <b>0.999*</b>  | 0.990          | 0.995          | -0.984         | <b>1.000**</b> | 0.994          | 0.991          | 0.991          | 0.988  | 0.294  | 0.294  | 0.290  |        |        |       |
|        |         | <i>p</i> |   | 0.032          | 0.091          | 0.067          | 0.115          | 0.005          | 0.071          | 0.084          | 0.085          | 0.097  | 0.810  | 0.810  | 0.813  |        |        |       |
|        | K       | <i>r</i> | 1 | 0.996          | <b>0.998*</b>  | -0.991         | <b>0.998*</b>  | <b>0.998*</b>  | 0.997          | 0.996          | 0.995          | 0.246  | 0.246  | 0.242  |        |        |        |       |
|        |         | <i>p</i> |   | 0.059          | 0.035          | 0.083          | 0.037          | 0.039          | 0.052          | 0.053          | 0.065          | 0.842  | 0.842  | 0.844  |        |        |        |       |
|        | P       | <i>r</i> | 1 | <b>0.999*</b>  | <b>-0.999*</b> | 0.989          | <b>1.000*</b>  | <b>1.000**</b> | <b>1.000**</b> | <b>1.000**</b> | <b>1.000**</b> | 0.155  | 0.155  | 0.150  |        |        |        |       |
|        |         | <i>p</i> |   | 0.024          | 0.024          | 0.096          | 0.020          | 0.007          | 0.006          | 0.005          | 0.901          | 0.901  | 0.904  |        |        |        |        |       |
|        | Na      | <i>r</i> | 1 | <b>-0.997*</b> | 0.994          | <b>1.000**</b> | <b>1.000*</b>  | <b>1.000*</b>  | <b>0.999*</b>  | 0.193          | 0.193          | 0.188  |        |        |        |        |        |       |
|        |         | <i>p</i> |   | 0.049          | 0.071          | 0.004          | 0.017          | 0.019          | 0.030          | 0.877          | 0.877          | 0.879  |        |        |        |        |        |       |
|        | Ca      | <i>r</i> | 1 | -0.982         | <b>-0.998*</b> | <b>-0.999*</b> | <b>-0.999*</b> | <b>-1.000*</b> | -0.117         | -0.117         | -0.113         |        |        |        |        |        |        |       |
|        |         | <i>p</i> |   | 0.120          | 0.044          | 0.031          | 0.030          | 0.019          | 0.925          | 0.925          | 0.928          |        |        |        |        |        |        |       |
|        | Mg      | <i>r</i> | 1 | 0.993          | 0.990          | 0.990          | 0.987          | 0.301          | 0.301          | 0.297          |                |        |        |        |        |        |        |       |
|        |         | <i>p</i> |   | 0.076          | 0.089          | 0.090          | 0.101          | 0.805          | 0.805          | 0.808          |                |        |        |        |        |        |        |       |
|        | Fe      | <i>r</i> | 1 | <b>1.000*</b>  | <b>1.000*</b>  | <b>0.999*</b>  | 0.186          | 0.186          | 0.182          |                |                |        |        |        |        |        |        |       |
|        |         | <i>p</i> |   | 0.013          | 0.014          | 0.026          | 0.881          | 0.881          | 0.884          |                |                |        |        |        |        |        |        |       |
|        | Zn      | <i>r</i> | 1 | <b>1.000**</b> | <b>1.000*</b>  | 0.166          | 0.166          | 0.161          |                |                |                |        |        |        |        |        |        |       |
|        |         | <i>p</i> |   | 0.001          | 0.013          | 0.894          | 0.894          | 0.897          |                |                |                |        |        |        |        |        |        |       |
|        | Cu      | <i>r</i> | 1 | <b>1.000*</b>  | 0.164          | 0.164          | 0.160          |                |                |                |                |        |        |        |        |        |        |       |
|        |         | <i>p</i> |   | 0.011          | 0.895          | 0.895          | 0.898          |                |                |                |                |        |        |        |        |        |        |       |
|        | EO      | <i>r</i> | 1 | 0.146          | 0.146          | 0.142          |                |                |                |                |                |        |        |        |        |        |        |       |
|        |         | <i>p</i> |   | 0.907          | 0.907          | 0.909          |                |                |                |                |                |        |        |        |        |        |        |       |
| Winter | Phenols | <i>r</i> | 1 | 0.793          | 0.997          | 0.164          | 0.839          | -0.647         | -0.811         | 0.816          | -0.785         | 0.829  | 0.819  | -0.797 | 0.823  | 0.706  | 0.707  | 0.705 |
| Plain  |         | <i>p</i> |   | 0.417          | 0.053          | 0.895          | 0.366          | 0.552          | 0.398          | 0.392          | 0.425          | 0.377  | 0.389  | 0.412  | 0.385  | 0.501  | 0.500  | 0.502 |
|        | FRAP    | <i>r</i> | 1 | 0.740          | 0.731          | 0.334          | -0.048         | -0.287         | 0.295          | -0.245         | 0.317          | 0.300  | -0.265 | 0.306  | 0.991  | 0.991  | 0.991  |       |



|        |         |          |   |       |                |        |        |                |                 |                |                |                 |                |                |        |        |        |                |
|--------|---------|----------|---|-------|----------------|--------|--------|----------------|-----------------|----------------|----------------|-----------------|----------------|----------------|--------|--------|--------|----------------|
|        |         | <i>p</i> |   | 0.470 | 0.478          | 0.783  | 0.969  | 0.815          | 0.809           | 0.842          | 0.795          | 0.806           | 0.830          | 0.802          | 0.084  | 0.083  | 0.085  |                |
|        | ABTS    | <i>r</i> |   | 1     | 0.082          | 0.881  | -0.708 | -0.857         | 0.861           | -0.834         | 0.873          | 0.864           | -0.844         | 0.867          | 0.645  | 0.646  | 0.644  |                |
|        |         | <i>p</i> |   |       | 0.947          | 0.313  | 0.499  | 0.345          | 0.340           | 0.372          | 0.325          | 0.336           | 0.360          | 0.332          | 0.554  | 0.553  | 0.555  |                |
|        | N       | <i>r</i> |   |       | 1              | -0.398 | 0.646  | 0.444          | -0.436          | 0.482          | -0.415         | -0.431          | 0.464          | -0.426         | 0.815  | 0.814  | 0.816  |                |
|        |         | <i>p</i> |   |       |                | 0.739  | 0.553  | 0.707          | 0.713           | 0.680          | 0.728          | 0.716           | 0.693          | 0.720          | 0.394  | 0.395  | 0.393  |                |
|        | K       | <i>r</i> |   |       |                | 1      | -0.957 | <b>-0.999*</b> | <b>0.999*</b>   | -0.996         | <b>1.000*</b>  | <b>0.999*</b>   | <b>-0.997*</b> | <b>1.000*</b>  | 0.208  | 0.209  | 0.206  |                |
|        |         | <i>p</i> |   |       |                |        | 0.186  | 0.032          | 0.026           | 0.059          | 0.012          | 0.023           | 0.047          | 0.019          | 0.867  | 0.866  | 0.868  |                |
|        | P       | <i>r</i> |   |       |                |        | 1      | 0.971          | -0.969          | 0.980          | -0.963         | -0.967          | 0.976          | -0.966         | 0.084  | 0.082  | 0.085  |                |
|        |         | <i>p</i> |   |       |                |        |        | 0.154          | 0.160           | 0.127          | 0.175          | 0.163           | 0.140          | 0.167          | 0.947  | 0.948  | 0.946  |                |
|        | Na      | <i>r</i> |   |       |                |        |        | 1              | <b>-1.000**</b> | <b>0.999*</b>  | <b>-0.999*</b> | <b>-1.000**</b> | <b>1.000*</b>  | <b>-1.000*</b> | -0.158 | -0.160 | -0.156 |                |
|        |         | <i>p</i> |   |       |                |        |        |                | 0.005           | 0.027          | 0.020          | 0.009           | 0.015          | 0.013          | 0.899  | 0.898  | 0.900  |                |
|        | Ca      | <i>r</i> |   |       |                |        |        |                | 1               | <b>-0.999*</b> | <b>1.000*</b>  | <b>1.000**</b>  | <b>-0.999*</b> | <b>1.000**</b> | 0.167  | 0.168  | 0.165  |                |
|        |         | <i>p</i> |   |       |                |        |        |                |                 | 0.033          | 0.015          | 0.003           | 0.020          | 0.007          | 0.893  | 0.892  | 0.894  |                |
|        | Mg      | <i>r</i> |   |       |                |        |        |                |                 | 1              | <b>-0.997*</b> | <b>-0.998*</b>  | <b>1.000*</b>  | <b>-0.998*</b> | -0.116 | -0.117 | -0.114 |                |
|        |         | <i>p</i> |   |       |                |        |        |                |                 |                | 0.048          | 0.036           | 0.013          | 0.040          | 0.926  | 0.925  | 0.927  |                |
|        | Fe      | <i>r</i> |   |       |                |        |        |                |                 |                | 1              | <b>1.000*</b>   | <b>-0.998*</b> | <b>1.000**</b> | 0.190  | 0.191  | 0.188  |                |
|        |         | <i>p</i> |   |       |                |        |        |                |                 |                |                | 0.012           | 0.035          | 0.008          | 0.879  | 0.878  | 0.880  |                |
|        | Zn      | <i>r</i> |   |       |                |        |        |                |                 |                |                | 1               | <b>-0.999*</b> | <b>1.000**</b> | 0.172  | 0.173  | 0.170  |                |
|        |         | <i>p</i> |   |       |                |        |        |                |                 |                |                |                 | 0.023          | 0.004          | 0.890  | 0.889  | 0.891  |                |
|        | Cu      | <i>r</i> |   |       |                |        |        |                |                 |                |                |                 | 1              | <b>-0.999*</b> | -0.135 | -0.137 | -0.134 |                |
|        |         | <i>p</i> |   |       |                |        |        |                |                 |                |                |                 |                | 0.027          | 0.914  | 0.913  | 0.915  |                |
|        | EO      | <i>r</i> |   |       |                |        |        |                |                 |                |                |                 |                | 1              | 0.178  | 0.179  | 0.176  |                |
|        |         | <i>p</i> |   |       |                |        |        |                |                 |                |                |                 |                |                | 0.886  | 0.885  | 0.887  |                |
| Spring | Phenols | <i>r</i> | 1 | 0.938 | 0.935          | -0.170 | 0.095  | 0.154          | 0.180           | 0.133          | -0.264         | -0.251          | 0.002          | -0.192         | -0.180 | -0.978 | -0.815 | -0.932         |
| Plain  |         | <i>p</i> |   | 0.225 | 0.230          | 0.891  | 0.940  | 0.901          | 0.885           | 0.915          | 0.830          | 0.839           | 0.999          | 0.877          | 0.885  | 0.135  | 0.394  | 0.236          |
|        | FRAP    | <i>r</i> |   | 1     | <b>1.000**</b> | 0.181  | 0.433  | 0.486          | 0.509           | 0.467          | -0.581         | -0.570          | 0.347          | -0.519         | -0.509 | -0.845 | -0.965 | <b>-1.000*</b> |
|        |         | <i>p</i> |   |       | 0.006          | 0.884  | 0.715  | 0.677          | 0.660           | 0.691          | 0.606          | 0.614           | 0.774          | 0.653          | 0.660  | 0.359  | 0.169  | 0.011          |

|      |          |   |       |               |               |               |        |                |               |                 |                 |        |        |        |                 |
|------|----------|---|-------|---------------|---------------|---------------|--------|----------------|---------------|-----------------|-----------------|--------|--------|--------|-----------------|
| ABTS | <i>r</i> | 1 | 0.190 | 0.441         | 0.494         | 0.517         | 0.475  | -0.588         | -0.577        | 0.355           | -0.526          | -0.517 | -0.840 | -0.967 | <b>-1.000**</b> |
|      | <i>p</i> |   | 0.879 | 0.709         | 0.671         | 0.654         | 0.685  | 0.600          | 0.608         | 0.769           | 0.647           | 0.654  | 0.365  | 0.164  | 0.005           |
| N    | <i>r</i> | 1 | 0.965 | 0.947         | 0.939         | 0.954         | -0.906 | -0.911         | 0.985         | -0.935          | -0.939          | 0.374  | -0.433 | -0.198 |                 |
|      | <i>p</i> |   | 0.169 | 0.207         | 0.224         | 0.194         | 0.279  | 0.270          | 0.110         | 0.232           | 0.224           | 0.756  | 0.715  | 0.873  |                 |
| K    | <i>r</i> |   | 1     | <b>0.998*</b> | 0.996         | <b>0.999*</b> | -0.985 | -0.987         | 0.996         | -0.995          | -0.996          | 0.116  | -0.655 | -0.448 |                 |
|      | <i>p</i> |   |       | 0.038         | 0.055         | 0.024         | 0.109  | 0.101          | 0.059         | 0.062           | 0.055           | 0.926  | 0.546  | 0.704  |                 |
| P    | <i>r</i> |   |       | 1             | <b>1.000*</b> | <b>1.000*</b> | -0.994 | -0.995         | 0.988         | <b>-0.999*</b>  | <b>-1.000*</b>  | 0.057  | -0.699 | -0.501 |                 |
|      | <i>p</i> |   |       |               | 0.017         | 0.014         | 0.071  | 0.063          | 0.098         | 0.024           | 0.017           | 0.964  | 0.507  | 0.666  |                 |
| Na   | <i>r</i> |   |       |               | 1             | <b>0.999*</b> | -0.996 | <b>-0.997*</b> | 0.984         | <b>-1.000**</b> | <b>-1.000**</b> | 0.031  | -0.717 | -0.524 |                 |
|      | <i>p</i> |   |       |               |               | 0.031         | 0.055  | 0.046          | 0.114         | 0.007           | 0.000           | 0.980  | 0.491  | 0.649  |                 |
| Ca   | <i>r</i> |   |       |               |               | 1             | -0.991 | -0.993         | 0.991         | <b>-0.998*</b>  | <b>-0.999*</b>  | 0.079  | -0.683 | -0.482 |                 |
|      | <i>p</i> |   |       |               |               |               | 0.085  | 0.077          | 0.084         | 0.038           | 0.031           | 0.950  | 0.521  | 0.680  |                 |
| Mg   | <i>r</i> |   |       |               |               |               | 1      | <b>1.000**</b> | -0.965        | <b>0.997*</b>   | 0.996           | 0.055  | 0.774  | 0.595  |                 |
|      | <i>p</i> |   |       |               |               |               |        | 0.008          | 0.169         | 0.047           | 0.055           | 0.965  | 0.436  | 0.595  |                 |
| Fe   | <i>r</i> |   |       |               |               |               |        | 1              | <b>-0.968</b> | <b>0.998*</b>   | <b>0.997*</b>   | 0.042  | 0.766  | 0.584  |                 |
|      | <i>p</i> |   |       |               |               |               |        |                | 0.161         | 0.039           | 0.046           | 0.973  | 0.445  | 0.603  |                 |
| Zn   | <i>r</i> |   |       |               |               |               |        |                | 1             | -0.982          | -0.984          | 0.209  | -0.581 | -0.363 |                 |
|      | <i>p</i> |   |       |               |               |               |        |                |               | 0.122           | 0.114           | 0.866  | 0.605  | 0.763  |                 |
| Cu   | <i>r</i> |   |       |               |               |               |        |                |               | 1               | <b>1.000**</b>  | -0.019 | 0.725  | 0.534  |                 |
|      | <i>p</i> |   |       |               |               |               |        |                |               |                 | 0.007           | 0.988  | 0.483  | 0.642  |                 |
| EO   | <i>r</i> |   |       |               |               |               |        |                |               |                 | 1               | -0.031 | 0.717  | 0.524  |                 |
|      | <i>p</i> |   |       |               |               |               |        |                |               |                 |                 | 0.980  | 0.491  | 0.649  |                 |

Statistically significant correlations are shown in bold letter (\* for  $p < 0.05$ , \*\* for  $p < 0.01$ ).

**Table S3.** Correlations coefficients and (*p*-values) between the antioxidant activity and essential oils components of *Sideritis*.

|        |         | Phenols  | FRAP | ABTS   | N      | K       | P       | Na     | Ca      | Mg     | Fe      | Zn      | Cu      | EO     | a pinene | Valeranone | b<br>phellandrene |         |
|--------|---------|----------|------|--------|--------|---------|---------|--------|---------|--------|---------|---------|---------|--------|----------|------------|-------------------|---------|
| Summer | Phenols | <i>r</i> | 1    | 0.991  | -0.962 | 0.546   | 0.554   | 0.565  | 0.912   | 0.555  | 0.578   | 0.577   | 0.581   | 0.578  | 0.488    | 0.585      | 0.584             | 0.585   |
| Mount. |         | <i>p</i> |      | 0.086  | 0.175  | 0.633   | 0.627   | 0.618  | 0.269   | 0.625  | 0.608   | 0.609   | 0.605   | 0.608  | 0.675    | 0.602      | 0.603             | 0.602   |
|        | FRAP    | <i>r</i> | 1    | -0.990 | 0.427  | 0.436   | 0.448   | 0.849  | 0.438   | 0.463  | 0.461   | 0.466   | 0.462   | 0.366  | 0.470    | 0.469      | 0.470             | 0.470   |
|        |         | <i>p</i> |      | 0.089  | 0.719  | 0.713   | 0.704   | 0.355  | 0.712   | 0.694  | 0.695   | 0.691   | 0.694   | 0.761  | 0.688    | 0.689      | 0.688             | 0.688   |
|        | ABTS    | <i>r</i> |      | 1      | -0.298 | -0.307  | -0.319  | -0.767 | -0.309  | -0.335 | -0.333  | -0.339  | -0.335  | -0.233 | -0.343   | -0.342     | -0.343            | -0.343  |
|        |         | <i>p</i> |      |        | 0.808  | 0.802   | 0.793   | 0.444  | 0.800   | 0.783  | 0.784   | 0.780   | 0.783   | 0.850  | 0.777    | 0.778      | 0.777             | 0.777   |
|        | N       | <i>r</i> |      |        | 1      | 1.000** | 1.000*  | 0.841  | 1.000** | 0.999* | 0.999*  | 0.999*  | 0.999*  | 0.998* | 0.999*   | 0.999*     | 0.999*            | 0.999*  |
|        |         | <i>p</i> |      |        |        | 0.006   | 0.015   | 0.364  | 0.007   | 0.025  | 0.024   | 0.027   | 0.025   | 0.043  | 0.031    | 0.030      | 0.030             | 0.030   |
|        | K       | <i>r</i> |      |        |        | 1       | 1.000** | 0.846  | 1.000** | 1.000* | 1.000*  | 0.999*  | 1.000*  | 0.997* | 0.999*   | 0.999*     | 0.999*            | 0.999*  |
|        |         | <i>p</i> |      |        |        |         | 0.009   | 0.358  | 0.001   | 0.019  | 0.018   | 0.021   | 0.019   | 0.049  | 0.024    | 0.024      | 0.024             | 0.024   |
|        | P       | <i>r</i> |      |        |        |         | 1       | 0.853  | 1.000** | 1.000* | 1.000** | 1.000*  | 1.000*  | 0.996  | 1.000*   | 1.000*     | 1.000*            | 1.000*  |
|        |         | <i>p</i> |      |        |        |         |         | 0.349  | 0.007   | 0.010  | 0.009   | 0.013   | 0.010   | 0.057  | 0.016    | 0.015      | 0.015             | 0.016   |
|        | Na      | <i>r</i> |      |        |        |         |         | 1      | 0.847   | 0.862  | 0.861   | 0.864   | 0.861   | 0.803  | 0.866    | 0.866      | 0.866             | 0.866   |
|        |         | <i>p</i> |      |        |        |         |         |        | 0.357   | 0.339  | 0.340   | 0.336   | 0.339   | 0.407  | 0.333    | 0.334      | 0.334             | 0.334   |
|        | Ca      | <i>r</i> |      |        |        |         |         |        | 1       | 1.000* | 1.000*  | 0.999*  | 1.000*  | 0.997* | 0.999*   | 0.999*     | 0.999*            | 0.999*  |
|        |         | <i>p</i> |      |        |        |         |         |        |         | 0.018  | 0.017   | 0.020   | 0.017   | 0.050  | 0.023    | 0.023      | 0.023             | 0.023   |
|        | Mg      | <i>r</i> |      |        |        |         |         |        |         | 1      | 1.000** | 1.000** | 1.000** | 0.994  | 1.000**  | 1.000**    | 1.000**           | 1.000** |
|        |         | <i>p</i> |      |        |        |         |         |        |         |        | 0.001   | 0.002   | 0.000   | 0.068  | 0.005    | 0.005      | 0.005             | 0.005   |
|        | Fe      | <i>r</i> |      |        |        |         |         |        |         |        | 1       | 1.000** | 1.000** | 0.995  | 1.000**  | 1.000**    | 1.000**           | 1.000** |
|        |         | <i>p</i> |      |        |        |         |         |        |         |        |         | 0.004   | 0.001   | 0.067  | 0.007    | 0.006      | 0.006             | 0.006   |
|        | Zn      | <i>r</i> |      |        |        |         |         |        |         |        |         | 1       | 1.000** | 0.994  | 1.000**  | 1.000**    | 1.000**           | 1.000** |
|        |         | <i>p</i> |      |        |        |         |         |        |         |        |         |         | 0.003   | 0.070  | 0.003    | 0.002      | 0.002             | 0.003   |
|        | Cu      | <i>r</i> |      |        |        |         |         |        |         |        |         |         | 1       | 0.994  | 1.000**  | 1.000**    | 1.000**           | 1.000** |
|        |         | <i>p</i> |      |        |        |         |         |        |         |        |         |         |         | 0.067  | 0.006    | 0.005      | 0.005             | 0.006   |

|               |                |          |   |       |        |               |               |               |                |                |                |                 |                |                 |                 |                 |                 |                 |
|---------------|----------------|----------|---|-------|--------|---------------|---------------|---------------|----------------|----------------|----------------|-----------------|----------------|-----------------|-----------------|-----------------|-----------------|-----------------|
|               | EO             | <i>r</i> |   |       |        |               |               |               |                |                |                |                 |                |                 | 1               | 0.993           | 0.994           | 0.993           |
|               |                | <i>p</i> |   |       |        |               |               |               |                |                |                |                 |                |                 |                 | 0.073           | 0.073           | 0.073           |
| <b>Autumn</b> | <b>Phenols</b> | <i>r</i> | 1 | 0.997 | 0.888  | -0.295        | -0.326        | -0.274        | -0.352         | 0.233          | 0.244          | -0.299          | 0.269          | -0.284          | 0.335           | 0.274           | 0.274           | 0.273           |
| <b>Mount.</b> |                | <i>p</i> |   | 0.053 | 0.304  | 0.810         | 0.789         | 0.823         | 0.771          | 0.850          | 0.843          | 0.806           | 0.827          | 0.816           | 0.783           | 0.823           | 0.823           | 0.824           |
|               | <b>FRAP</b>    | <i>r</i> | 1 | 0.924 | -0.373 | -0.403        | -0.353        | -0.429        | 0.313          | 0.324          | -0.378         | 0.348           | -0.363         | 0.412           | 0.353           | 0.353           | 0.353           | 0.353           |
|               |                | <i>p</i> |   | 0.251 | 0.757  | 0.736         | 0.770         | 0.718         | 0.797          | 0.790          | 0.753          | 0.774           | 0.763          | 0.730           | 0.770           | 0.770           | 0.770           | 0.771           |
|               | <b>ABTS</b>    | <i>r</i> |   | 1     | -0.700 | -0.724        | -0.685        | -0.742        | 0.653          | 0.662          | -0.704         | 0.681           | -0.693         | 0.730           | 0.685           | 0.685           | 0.685           | 0.685           |
|               |                | <i>p</i> |   |       | 0.506  | 0.485         | 0.520         | 0.467         | 0.547          | 0.539          | 0.503          | 0.523           | 0.513          | 0.479           | 0.520           | 0.520           | 0.520           | 0.520           |
|               | <b>N</b>       | <i>r</i> |   |       | 1      | <b>0.999*</b> | <b>1.000*</b> | <b>0.998*</b> | <b>-0.998*</b> | <b>-0.999*</b> | <b>1.000**</b> | <b>-1.000*</b>  | <b>1.000**</b> | <b>-0.999*</b>  | <b>-1.000*</b>  | <b>-1.000*</b>  | <b>-1.000*</b>  | <b>-1.000*</b>  |
|               |                | <i>p</i> |   |       |        | 0.021         | 0.014         | 0.039         | 0.041          | 0.033          | 0.003          | 0.017           | 0.007          | 0.027           | 0.014           | 0.014           | 0.014           | 0.014           |
|               | <b>K</b>       | <i>r</i> |   |       |        | 1             | <b>0.999*</b> | <b>1.000*</b> | -0.995         | -0.996         | <b>1.000*</b>  | <b>-0.998*</b>  | <b>0.999*</b>  | <b>-1.000**</b> | <b>-0.999*</b>  | <b>-0.999*</b>  | <b>-0.999*</b>  | <b>-0.998*</b>  |
|               |                | <i>p</i> |   |       |        |               | 0.035         | 0.018         | 0.062          | 0.054          | 0.018          | 0.038           | 0.028          | 0.006           | 0.035           | 0.035           | 0.035           | 0.035           |
|               | <b>P</b>       | <i>r</i> |   |       |        |               | 1             | 0.997         | <b>-0.999*</b> | <b>-1.000*</b> | <b>1.000*</b>  | <b>-1.000**</b> | <b>1.000**</b> | <b>-0.998*</b>  | <b>-1.000**</b> | <b>-1.000**</b> | <b>-1.000**</b> | <b>-1.000**</b> |
|               |                | <i>p</i> |   |       |        |               |               | 0.052         | 0.027          | 0.019          | 0.017          | 0.003           | 0.007          | 0.041           | 0.000           | 0.000           | 0.000           | 0.000           |
|               | <b>Na</b>      | <i>r</i> |   |       |        |               |               | 1             | -0.992         | -0.994         | <b>0.998*</b>  | -0.996          | <b>0.997*</b>  | <b>-1.000*</b>  | -0.997          | -0.997          | -0.997          | -0.997          |
|               |                | <i>p</i> |   |       |        |               |               |               | 0.079          | 0.072          | 0.035          | 0.056           | 0.045          | 0.012           | 0.052           | 0.052           | 0.052           | 0.053           |
|               | <b>Ca</b>      | <i>r</i> |   |       |        |               |               |               | 1              | <b>1.000**</b> | <b>-0.998*</b> | <b>0.999*</b>   | <b>-0.999*</b> | 0.994           | <b>0.999*</b>   | <b>0.999*</b>   | <b>0.999*</b>   | <b>0.999*</b>   |
|               |                | <i>p</i> |   |       |        |               |               |               |                | 0.008          | 0.044          | 0.023           | 0.034          | 0.068           | 0.027           | 0.027           | 0.027           | 0.027           |
|               | <b>Mg</b>      | <i>r</i> |   |       |        |               |               |               |                | 1              | <b>-0.998*</b> | <b>1.000*</b>   | <b>-0.999*</b> | 0.996           | <b>1.000*</b>   | <b>1.000*</b>   | <b>1.000*</b>   | <b>1.000*</b>   |
|               |                | <i>p</i> |   |       |        |               |               |               |                |                | 0.036          | 0.016           | 0.026          | 0.060           | 0.020           | 0.019           | 0.019           | 0.019           |
|               | <b>Fe</b>      | <i>r</i> |   |       |        |               |               |               |                |                | 1              | <b>-0.999*</b>  | <b>1.000**</b> | <b>-0.999*</b>  | <b>-1.000*</b>  | <b>-1.000*</b>  | <b>-1.000*</b>  | <b>-1.000*</b>  |
|               |                | <i>p</i> |   |       |        |               |               |               |                |                |                | 0.020           | 0.010          | 0.024           | 0.017           | 0.017           | 0.017           | 0.017           |
|               | <b>Zn</b>      | <i>r</i> |   |       |        |               |               |               |                |                |                | 1               | <b>-1.000*</b> | <b>0.998*</b>   | <b>1.000**</b>  | <b>1.000**</b>  | <b>1.000**</b>  | <b>1.000**</b>  |
|               |                | <i>p</i> |   |       |        |               |               |               |                |                |                |                 | 0.011          | 0.044           | 0.004           | 0.003           | 0.003           | 0.003           |
|               | <b>Cu</b>      | <i>r</i> |   |       |        |               |               |               |                |                |                |                 | 1              | <b>-0.999*</b>  | <b>-1.000**</b> | <b>-1.000**</b> | <b>-1.000**</b> | <b>-1.000**</b> |
|               |                | <i>p</i> |   |       |        |               |               |               |                |                |                |                 |                | 0.034           | 0.007           | 0.007           | 0.007           | 0.007           |
|               | <b>EO</b>      | <i>r</i> |   |       |        |               |               |               |                |                |                |                 |                |                 | 1               | <b>0.998*</b>   | <b>0.998*</b>   | <b>0.998*</b>   |

|        |         |          |                |                 |                 |                 |                 |                 |                 |                 |                 |                 |                 |                 |                 |                 |                 |                 |
|--------|---------|----------|----------------|-----------------|-----------------|-----------------|-----------------|-----------------|-----------------|-----------------|-----------------|-----------------|-----------------|-----------------|-----------------|-----------------|-----------------|-----------------|
|        |         | <i>p</i> |                |                 |                 |                 |                 |                 |                 |                 |                 |                 |                 |                 |                 | 0.041           | 0.041           | 0.041           |
| Winter | Phenols | <i>r</i> | 1              | 0.907           | 0.658           | 0.628           | -0.854          | -0.851          | . <sup>a</sup>  | 0.767           | -0.962          | -0.891          | -0.856          | 0.830           | -0.836          | -0.836          | -0.836          | -0.836          |
| Mount. |         | <i>p</i> |                | 0.276           | 0.543           | 0.568           | 0.349           | 0.352           |                 | 0.443           | 0.176           | 0.300           | 0.345           | 0.377           | 0.370           | 0.370           | 0.370           | 0.370           |
|        | FRAP    | <i>r</i> | 1              | 0.280           | 0.243           | -0.556          | -0.551          | . <sup>a</sup>  | 0.427           | -0.988          | -0.617          | -0.560          | 0.518           | -0.528          | -0.528          | -0.527          | -0.528          | -0.528          |
|        |         | <i>p</i> |                | 0.819           | 0.844           | 0.625           | 0.629           |                 | 0.719           | 0.101           | 0.577           | 0.622           | 0.653           | 0.646           | 0.646           | 0.646           | 0.646           | 0.646           |
|        | ABTS    | <i>r</i> | 1              | <b>0.999*</b>   | -0.954          | -0.956          | . <sup>a</sup>  | 0.988           | -0.428          | -0.928          | -0.952          | 0.966           | -0.963          | -0.963          | -0.963          | -0.963          | -0.963          | -0.963          |
|        |         | <i>p</i> |                | 0.025           | 0.194           | 0.190           |                 | 0.100           | 0.718           | 0.242           | 0.197           | 0.166           | 0.173           | 0.173           | 0.173           | 0.173           | 0.173           | 0.173           |
|        | N       | <i>r</i> | 1              | -0.941          | -0.943          | . <sup>a</sup>  | 0.981           | -0.392          | -0.913          | -0.940          | 0.956           | -0.952          | -0.952          | -0.952          | -0.952          | -0.952          | -0.952          | -0.952          |
|        |         | <i>p</i> |                | 0.219           | 0.215           |                 | 0.124           | 0.743           | 0.267           | 0.222           | 0.191           | 0.198           | 0.198           | 0.197           | 0.198           | 0.197           | 0.198           | 0.198           |
|        | K       | <i>r</i> | 1              | <b>1.000**</b>  | . <sup>a</sup>  | -0.989          | 0.680           | <b>0.997*</b>   | <b>1.000**</b>  | <b>-0.999*</b>  | <b>0.999*</b>   |
|        |         | <i>p</i> |                | 0.004           |                 | 0.094           | 0.524           | 0.048           | 0.003           | 0.028           | 0.021           | 0.021           | 0.021           | 0.021           | 0.021           | 0.021           | 0.021           | 0.021           |
|        | P       | <i>r</i> | 1              | . <sup>a</sup>  | -0.990          | 0.675           | 0.997           | <b>1.000**</b>  | <b>-0.999*</b>  | <b>1.000*</b>   |
|        |         | <i>p</i> |                | 0.091           | 0.528           | 0.052           | 0.007           | 0.025           | 0.017           | 0.017           | 0.017           | 0.018           | 0.017           | 0.018           | 0.017           | 0.018           | 0.017           | 0.017           |
|        | Na      | <i>r</i> | . <sup>a</sup> | . <sup>a</sup>  | . <sup>a</sup>  | . <sup>a</sup>  | . <sup>a</sup>  | . <sup>a</sup>  | . <sup>a</sup>  | . <sup>a</sup>  | . <sup>a</sup>  | . <sup>a</sup>  | . <sup>a</sup>  | . <sup>a</sup>  | . <sup>a</sup>  | . <sup>a</sup>  | . <sup>a</sup>  | . <sup>a</sup>  |
|        |         | <i>p</i> |                |                 |                 |                 |                 |                 |                 |                 |                 |                 |                 |                 |                 |                 |                 |                 |
|        | Ca      | <i>r</i> | 1              | -0.564          | -0.975          | -0.988          | 0.995           | -0.993          | -0.993          | -0.993          | -0.993          | -0.993          | -0.993          | -0.993          | -0.993          | -0.993          | -0.993          | -0.993          |
|        |         | <i>p</i> |                | 0.619           | 0.143           | 0.098           | 0.066           | 0.073           | 0.073           | 0.073           | 0.073           | 0.073           | 0.073           | 0.073           | 0.073           | 0.073           | 0.073           | 0.073           |
|        | Mg      | <i>r</i> | 1              | 0.733           | 0.683           | -0.646          | 0.655           | 0.655           | 0.654           | 0.655           | 0.655           | 0.654           | 0.655           | 0.655           | 0.654           | 0.655           | 0.655           | 0.655           |
|        |         | <i>p</i> |                | 0.476           | 0.521           | 0.553           | 0.546           | 0.545           | 0.546           | 0.546           | 0.546           | 0.546           | 0.546           | 0.546           | 0.546           | 0.546           | 0.546           | 0.546           |
|        | Fe      | <i>r</i> | 1              | <b>0.997*</b>   | -0.993          | 0.994           | 0.994           | 0.994           | 0.994           | 0.994           | 0.994           | 0.994           | 0.994           | 0.994           | 0.994           | 0.994           | 0.994           | 0.994           |
|        |         | <i>p</i> |                | 0.045           | 0.077           | 0.070           | 0.069           | 0.070           | 0.070           | 0.070           | 0.070           | 0.070           | 0.070           | 0.070           | 0.070           | 0.070           | 0.070           | 0.070           |
|        | Zn      | <i>r</i> | 1              | <b>-0.999*</b>  | <b>0.999*</b>   |
|        |         | <i>p</i> |                | 0.032           | 0.024           | 0.024           | 0.025           | 0.024           | 0.024           | 0.024           | 0.024           | 0.024           | 0.024           | 0.024           | 0.024           | 0.024           | 0.024           | 0.024           |
|        | Cu      | <i>r</i> | 1              | <b>-1.000**</b> |
|        |         | <i>p</i> |                | 0.007           | 0.007           | 0.007           | 0.007           | 0.007           | 0.007           | 0.007           | 0.007           | 0.007           | 0.007           | 0.007           | 0.007           | 0.007           | 0.007           | 0.007           |
|        | EO      | <i>r</i> | 1              | <b>1.000**</b>  |
|        |         | <i>p</i> |                | 0.000           | 0.000           | 0.000           | 0.000           | 0.000           | 0.000           | 0.000           | 0.000           | 0.000           | 0.000           | 0.000           | 0.000           | 0.000           | 0.000           | 0.000           |

|        |         |          |          |                 |                 |                |                 |                 |               |                |                 |                |                |               |        |        |        |       |        |
|--------|---------|----------|----------|-----------------|-----------------|----------------|-----------------|-----------------|---------------|----------------|-----------------|----------------|----------------|---------------|--------|--------|--------|-------|--------|
| Spring | Phenols | <i>r</i> | 1        | 0.842           | 0.811           | -0.896         | 0.957           | 0.977           | 0.937         | 0.954          | 0.965           | 0.968          | 0.939          | -0.935        | 0.986  | 0.937  | -0.937 | 0.937 |        |
| Mount. |         | <i>p</i> |          | 0.363           | 0.397           | 0.293          | 0.187           | 0.136           | 0.227         | 0.194          | 0.169           | 0.161          | 0.223          | 0.230         | 0.106  | 0.227  | 0.227  | 0.227 |        |
|        | FRAP    | <i>r</i> | 1        | <b>0.999*</b>   | -0.994          | 0.962          | 0.937           | 0.977           | 0.965         | 0.954          | 0.950           | 0.976          | -0.978         | 0.920         | 0.977  | -0.977 | 0.977  |       |        |
|        |         | <i>p</i> |          | 0.035           | 0.070           | 0.176          | 0.227           | 0.136           | 0.169         | 0.194          | 0.202           | 0.140          | 0.132          | 0.257         | 0.136  | 0.136  | 0.136  |       |        |
|        | ABTS    | <i>r</i> | 1        | -0.987          | 0.946           | 0.917          | 0.964           | 0.949           | 0.936         | 0.932          | 0.963           | -0.966         | 0.897          | 0.964         | -0.964 | 0.964  |        |       |        |
|        |         | <i>p</i> |          | 0.104           | 0.211           | 0.262          | 0.170           | 0.204           | 0.228         | 0.237          | 0.174           | 0.167          | 0.291          | 0.170         | 0.171  | 0.170  |        |       |        |
|        | N       | <i>r</i> | 1        | -0.986          | -0.970          | -0.995         | -0.988          | -0.981          | -0.978        | -0.994         | 0.995           | -0.957         | -0.995         | 0.995         | -0.995 |        |        |       |        |
|        |         | <i>p</i> |          | 0.106           | 0.157           | 0.066          | 0.099           | 0.124           | 0.132         | 0.070          | 0.063           | 0.187          | 0.066          | 0.066         | 0.066  |        |        |       |        |
|        | K       | <i>r</i> | 1        | 0.997           | <b>0.998*</b>   | <b>1.000**</b> | <b>1.000*</b>   | <b>0.999*</b>   | <b>0.998*</b> | <b>-0.998*</b> | 0.992           | <b>0.998*</b>  | <b>-0.998*</b> | <b>0.998*</b> |        |        |        |       |        |
|        |         | <i>p</i> |          | 0.051           | 0.040           | 0.007          | 0.018           | 0.026           | 0.036         | 0.044          | 0.081           | 0.040          | 0.040          | 0.040         |        |        |        |       |        |
|        | P       | <i>r</i> | 1        | 0.990           | 0.996           | <b>0.999*</b>  | <b>0.999*</b>   | 0.991           | -0.989        | <b>0.999*</b>  | 0.990           | -0.990         | 0.990          |               |        |        |        |       |        |
|        |         | <i>p</i> |          | 0.091           | 0.058           | 0.033          | 0.025           | 0.087           | 0.095         | 0.030          | 0.091           | 0.091          | 0.091          |               |        |        |        |       |        |
|        | Na      | <i>r</i> | 1        | <b>0.999*</b>   | 0.996           | 0.995          | <b>1.000**</b>  | <b>-1.000**</b> | 0.982         | <b>1.000**</b> | <b>-1.000**</b> | <b>1.000**</b> |                |               |        |        |        |       |        |
|        |         | <i>p</i> |          | 0.033           | 0.058           | 0.066          | 0.004           | 0.003           | 0.121         | 0.000          | 0.000           | 0.000          |                |               |        |        |        |       |        |
|        | Ca      | <i>r</i> | 1        | <b>0.999*</b>   | <b>0.999*</b>   | <b>0.999*</b>  | <b>-0.998*</b>  | 0.991           | <b>0.999*</b> | <b>-0.999*</b> | <b>0.999*</b>   |                |                |               |        |        |        |       |        |
|        |         | <i>p</i> |          | 0.024           | 0.033           | 0.029          | 0.037           | 0.088           | 0.033         | 0.033          | 0.033           |                |                |               |        |        |        |       |        |
|        | Mg      | <i>r</i> | 1        | <b>1.000**</b>  | 0.996           | -0.995         | 0.995           | 0.996           | -0.996        | 0.996          |                 |                |                |               |        |        |        |       |        |
|        |         | <i>p</i> |          | 0.009           | 0.054           | 0.061          | 0.063           | 0.058           | 0.058         | 0.058          |                 |                |                |               |        |        |        |       |        |
|        | Fe      | <i>r</i> | 1        | 0.995           | -0.994          | 0.996          | 0.995           | -0.995          | 0.995         |                |                 |                |                |               |        |        |        |       |        |
|        |         | <i>p</i> |          | 0.062           | 0.070           | 0.055          | 0.066           | 0.066           | 0.066         |                |                 |                |                |               |        |        |        |       |        |
|        | Zn      | <i>r</i> | 1        | <b>-1.000**</b> | 0.983           | <b>1.000**</b> | <b>-1.000**</b> | <b>1.000**</b>  |               |                |                 |                |                |               |        |        |        |       |        |
|        |         | <i>p</i> |          | 0.007           | 0.117           | 0.004          | 0.004           | 0.004           |               |                |                 |                |                |               |        |        |        |       |        |
|        | Cu      | <i>r</i> | 1        | -0.981          | <b>-1.000**</b> | <b>1.000**</b> | <b>-1.000**</b> |                 |               |                |                 |                |                |               |        |        |        |       |        |
|        |         | <i>p</i> |          | 0.124           | 0.003           | 0.004          | 0.003           |                 |               |                |                 |                |                |               |        |        |        |       |        |
|        | EO      | <i>r</i> | 1        | 0.982           | -0.982          | 0.982          |                 |                 |               |                |                 |                |                |               |        |        |        |       |        |
|        |         | <i>p</i> |          | 0.121           | 0.121           | 0.121          |                 |                 |               |                |                 |                |                |               |        |        |        |       |        |
|        |         | Phenols  | <i>r</i> | 1               | <b>0.999*</b>   | <b>1.000*</b>  | 0.957           | 0.742           | 0.741         | -0.976         | -0.731          | 0.741          | 0.807          | 0.741         | -0.732 | -0.738 | -0.738 | 0.738 | -0.738 |

|        |         |          |       |               |       |       |                |                |                 |                 |        |                 |                 |                 |                 |                 |                 |
|--------|---------|----------|-------|---------------|-------|-------|----------------|----------------|-----------------|-----------------|--------|-----------------|-----------------|-----------------|-----------------|-----------------|-----------------|
| Summer |         | <i>p</i> | 0.034 | 0.011         | 0.186 | 0.468 | 0.469          | 0.139          | 0.478           | 0.469           | 0.402  | 0.469           | 0.477           | 0.472           | 0.472           | 0.472           | 0.472           |
| Plain  | FRAP    | <i>r</i> | 1     | <b>0.999*</b> | 0.971 | 0.777 | 0.776          | -0.987         | -0.766          | 0.776           | 0.837  | 0.776           | -0.768          | -0.773          | -0.773          | 0.773           | -0.773          |
|        |         | <i>p</i> |       | 0.023         | 0.152 | 0.434 | 0.435          | 0.105          | 0.444           | 0.434           | 0.368  | 0.435           | 0.443           | 0.438           | 0.438           | 0.438           | 0.438           |
|        | ABTS    | <i>r</i> |       | 1             | 0.962 | 0.753 | 0.753          | -0.980         | -0.743          | 0.753           | 0.817  | 0.753           | -0.744          | -0.749          | -0.749          | 0.749           | -0.749          |
|        |         | <i>p</i> |       |               | 0.175 | 0.457 | 0.458          | 0.127          | 0.467           | 0.457           | 0.391  | 0.458           | 0.466           | 0.461           | 0.461           | 0.461           | 0.461           |
|        | N       | <i>r</i> |       |               | 1     | 0.904 | 0.903          | <b>-0.997*</b> | -0.897          | 0.903           | 0.943  | 0.903           | -0.898          | -0.901          | -0.901          | 0.901           | -0.901          |
|        |         | <i>p</i> |       |               |       | 0.281 | 0.282          | 0.048          | 0.292           | 0.282           | 0.216  | 0.282           | 0.290           | 0.285           | 0.285           | 0.285           | 0.285           |
|        | K       | <i>r</i> |       |               |       | 1     | <b>1.000**</b> | -0.869         | <b>-1.000*</b>  | <b>1.000**</b>  | 0.995  | <b>1.000**</b>  | <b>-1.000**</b> | <b>-1.000**</b> | <b>-1.000**</b> | <b>1.000**</b>  | <b>-1.000**</b> |
|        |         | <i>p</i> |       |               |       |       | 0.001          | 0.329          | 0.010           | 0.001           | 0.066  | 0.001           | 0.009           | 0.004           | 0.004           | 0.004           | 0.004           |
|        | P       | <i>r</i> |       |               |       |       | 1              | -0.868         | <b>-1.000**</b> | <b>1.000**</b>  | 0.995  | <b>1.000**</b>  | <b>-1.000**</b> | <b>-1.000**</b> | <b>-1.000**</b> | <b>1.000**</b>  | <b>-1.000**</b> |
|        |         | <i>p</i> |       |               |       |       |                | 0.330          | 0.009           | 0.000           | 0.067  | 0.000           | 0.008           | 0.003           | 0.003           | 0.003           | 0.003           |
|        | Na      | <i>r</i> |       |               |       |       |                | 1              | 0.861           | -0.869          | -0.915 | -0.868          | 0.862           | 0.866           | 0.866           | -0.866          | 0.866           |
|        |         | <i>p</i> |       |               |       |       |                |                | 0.340           | 0.330           | 0.264  | 0.330           | 0.338           | 0.333           | 0.333           | 0.333           | 0.333           |
|        | Ca      | <i>r</i> |       |               |       |       |                |                | 1               | <b>-1.000**</b> | -0.993 | <b>-1.000**</b> | <b>1.000**</b>  | <b>1.000**</b>  | <b>1.000**</b>  | <b>-1.000**</b> | <b>1.000**</b>  |
|        |         | <i>p</i> |       |               |       |       |                |                |                 | 0.010           | 0.076  | 0.009           | 0.002           | 0.006           | 0.006           | 0.006           | 0.006           |
|        | Mg      | <i>r</i> |       |               |       |       |                |                |                 | 1               | 0.995  | <b>1.000**</b>  | <b>-1.000**</b> | <b>-1.000**</b> | <b>-1.000**</b> | <b>1.000**</b>  | <b>-1.000**</b> |
|        |         | <i>p</i> |       |               |       |       |                |                |                 |                 | 0.066  | 0.000           | 0.008           | 0.003           | 0.003           | 0.003           | 0.003           |
|        | Fe      | <i>r</i> |       |               |       |       |                |                |                 |                 | 1      | 0.995           | -0.993          | -0.994          | -0.994          | 0.994           | -0.994          |
|        |         | <i>p</i> |       |               |       |       |                |                |                 |                 |        | 0.067           | 0.074           | 0.070           | 0.070           | 0.070           | 0.070           |
|        | Zn      | <i>r</i> |       |               |       |       |                |                |                 |                 |        | 1               | <b>-1.000**</b> | <b>-1.000**</b> | <b>-1.000**</b> | <b>1.000**</b>  | <b>-1.000**</b> |
|        |         | <i>p</i> |       |               |       |       |                |                |                 |                 |        |                 | 0.008           | 0.003           | 0.003           | 0.003           | 0.003           |
|        | Cu      | <i>r</i> |       |               |       |       |                |                |                 |                 |        |                 | 1               | <b>1.000**</b>  | <b>1.000**</b>  | <b>-1.000**</b> | <b>1.000**</b>  |
|        |         | <i>p</i> |       |               |       |       |                |                |                 |                 |        |                 |                 | 0.005           | 0.005           | 0.005           | 0.005           |
|        | EO      | <i>r</i> |       |               |       |       |                |                |                 |                 |        |                 |                 | 1               | <b>1.000**</b>  | <b>-1.000**</b> | <b>1.000**</b>  |
|        |         | <i>p</i> |       |               |       |       |                |                |                 |                 |        |                 |                 |                 | 0.000           | 0.000           | 0.000           |
| Autumn | Phenols | <i>r</i> | 1     | <b>0.999*</b> | 0.860 | 0.988 | -0.957         | -0.973         | -0.978          | 0.976           | 0.983  | 0.978           | 0.977           | 0.976           | 0.973           | 0.973           | 0.973           |
| Plain  |         | <i>p</i> |       | 0.031         | 0.341 | 0.100 | 0.188          | 0.149          | 0.133           | 0.139           | 0.119  | 0.135           | 0.137           | 0.140           | 0.149           | 0.149           | 0.149           |

|        |         |          |   |                 |                 |                 |                 |                 |                 |                 |                 |                 |                 |                 |                 |                 |                 |
|--------|---------|----------|---|-----------------|-----------------|-----------------|-----------------|-----------------|-----------------|-----------------|-----------------|-----------------|-----------------|-----------------|-----------------|-----------------|-----------------|
|        | FRAP    | <i>r</i> | 1 | 0.884           | 0.979           | -0.970          | -0.983          | -0.987          | 0.986           | 0.990           | 0.987           | 0.986           | 0.985           | 0.983           | 0.983           | 0.983           | 0.983           |
|        |         | <i>p</i> |   | 0.310           | 0.131           | 0.157           | 0.118           | 0.102           | 0.108           | 0.088           | 0.104           | 0.106           | 0.109           | 0.118           | 0.118           | 0.118           | 0.118           |
|        | ABTS    | <i>r</i> | 1 | 0.769           | -0.971          | -0.955          | -0.947          | 0.950           | 0.940           | 0.948           | 0.949           | 0.950           | 0.955           | 0.955           | 0.955           | 0.955           | 0.955           |
|        |         | <i>p</i> |   | 0.442           | 0.153           | 0.193           | 0.209           | 0.202           | 0.222           | 0.206           | 0.204           | 0.201           | 0.193           | 0.193           | 0.193           | 0.193           | 0.193           |
|        | N       | <i>r</i> | 1 | -0.899          | -0.924          | -0.934          | 0.930           | 0.941           | 0.932           | 0.931           | 0.930           | 0.924           | 0.924           | 0.924           | 0.924           | 0.924           | 0.924           |
|        |         | <i>p</i> |   | 0.289           | 0.249           | 0.233           | 0.240           | 0.219           | 0.235           | 0.237           | 0.240           | 0.249           | 0.249           | 0.249           | 0.249           | 0.249           | 0.249           |
|        | K       | <i>r</i> | 1 | <b>0.998*</b>   | 0.996           | <b>-0.997*</b>  | -0.994          | -0.996          | -0.997          | <b>-0.997*</b>  | <b>-0.998*</b>  |
|        |         | <i>p</i> |   | 0.040           | 0.056           | 0.049           | 0.069           | 0.053           | 0.051           | 0.048           | 0.040           | 0.040           | 0.040           | 0.040           | 0.040           | 0.040           | 0.040           |
|        | P       | <i>r</i> | 1 | <b>1.000*</b>   | <b>-1.000**</b> | <b>-0.999*</b>  | <b>-1.000*</b>  | <b>-1.000*</b>  | <b>-1.000*</b>  | <b>-1.000**</b> |
|        |         | <i>p</i> |   | 0.016           | 0.009           | 0.030           | 0.014           | 0.012           | 0.009           | 0.000           | 0.000           | 0.000           | 0.000           | 0.000           | 0.000           | 0.000           | 0.000           |
|        | Na      | <i>r</i> | 1 | <b>-1.000**</b> | <b>-1.000*</b>  | <b>-1.000**</b> | <b>-1.000**</b> | <b>-1.000**</b> | <b>-1.000**</b> | <b>-1.000**</b> | <b>-1.000*</b>  |
|        |         | <i>p</i> |   | 0.007           | 0.014           | 0.002           | 0.004           | 0.007           | 0.016           | 0.016           | 0.016           | 0.016           | 0.016           | 0.016           | 0.016           | 0.016           | 0.016           |
|        | Ca      | <i>r</i> | 1 | <b>0.999*</b>   | <b>1.000**</b>  |
|        |         | <i>p</i> |   | 0.020           | 0.004           | 0.002           | 0.001           | 0.009           | 0.009           | 0.009           | 0.009           | 0.009           | 0.009           | 0.009           | 0.009           | 0.009           | 0.009           |
|        | Mg      | <i>r</i> | 1 | <b>1.000*</b>   | <b>1.000*</b>   | <b>0.999*</b>   |
|        |         | <i>p</i> |   | 0.016           | 0.018           | 0.021           | 0.030           | 0.030           | 0.030           | 0.030           | 0.030           | 0.030           | 0.030           | 0.030           | 0.030           | 0.030           | 0.030           |
|        | Fe      | <i>r</i> | 1 | <b>1.000**</b>  | <b>1.000**</b>  | <b>1.000*</b>   |
|        |         | <i>p</i> |   | 0.002           | 0.005           | 0.014           | 0.014           | 0.014           | 0.014           | 0.014           | 0.014           | 0.014           | 0.014           | 0.014           | 0.014           | 0.014           | 0.014           |
|        | Zn      | <i>r</i> | 1 | <b>1.000**</b>  | <b>1.000*</b>   |
|        |         | <i>p</i> |   | 0.003           | 0.012           | 0.012           | 0.012           | 0.012           | 0.012           | 0.012           | 0.012           | 0.012           | 0.012           | 0.012           | 0.012           | 0.012           | 0.012           |
|        | Cu      | <i>r</i> | 1 | <b>1.000**</b>  |
|        |         | <i>p</i> |   | 0.009           | 0.009           | 0.009           | 0.009           | 0.009           | 0.009           | 0.009           | 0.009           | 0.009           | 0.009           | 0.009           | 0.009           | 0.009           | 0.009           |
|        | EO      | <i>r</i> | 1 | <b>1.000**</b>  |
|        |         | <i>p</i> |   | 0.000           | 0.000           | 0.000           | 0.000           | 0.000           | 0.000           | 0.000           | 0.000           | 0.000           | 0.000           | 0.000           | 0.000           | 0.000           | 0.000           |
| Winter | Phenols | <i>r</i> | 1 | 0.916           | 0.911           | 0.996           | 0.303           | -0.206          | -0.166          | -0.229          | -0.035          | 0.266           | 0.249           | 0.256           | 0.272           | -0.246          | -0.246          |
| Plain  |         | <i>p</i> |   | 0.263           | 0.270           | 0.054           | 0.804           | 0.868           | 0.894           | 0.853           | 0.977           | 0.829           | 0.839           | 0.835           | 0.825           | 0.842           | 0.841           |
|        | FRAP    | <i>r</i> | 1 | <b>1.000**</b>  | 0.878           | -0.105          | 0.205           | 0.245           | 0.181           | 0.369           | -0.144          | -0.161          | -0.154          | 0.635           | 0.164           | 0.164           | 0.163           |



|        |         |          |   |       |               |        |        |               |                |        |                |                |                |        |                 |                 |                 |
|--------|---------|----------|---|-------|---------------|--------|--------|---------------|----------------|--------|----------------|----------------|----------------|--------|-----------------|-----------------|-----------------|
|        |         | <i>p</i> |   | 0.007 | 0.317         | 0.933  | 0.869  | 0.843         | 0.884          | 0.759  | 0.908          | 0.897          | 0.902          | 0.562  | 0.895           | 0.895           | 0.895           |
|        | ABTS    | <i>r</i> |   | 1     | 0.873         | -0.117 | 0.216  | 0.256         | 0.192          | 0.380  | -0.155         | -0.172         | -0.165         | 0.644  | 0.175           | 0.175           | 0.175           |
|        |         | <i>p</i> |   |       | 0.325         | 0.926  | 0.862  | 0.835         | 0.877          | 0.752  | 0.901          | 0.890          | 0.894          | 0.554  | 0.888           | 0.888           | 0.888           |
|        | N       | <i>r</i> |   |       | 1             | 0.383  | -0.288 | -0.249        | -0.311         | -0.120 | 0.347          | 0.331          | 0.337          | 0.189  | -0.328          | -0.328          | -0.328          |
|        |         | <i>p</i> |   |       |               | 0.750  | 0.814  | 0.840         | 0.799          | 0.923  | 0.775          | 0.785          | 0.781          | 0.879  | 0.788           | 0.787           | 0.787           |
|        | K       | <i>r</i> |   |       |               | 1      | -0.995 | -0.990        | <b>-0.997*</b> | -0.963 | <b>0.999*</b>  | <b>0.998*</b>  | <b>0.999*</b>  | -0.835 | <b>-0.998*</b>  | <b>-0.998*</b>  | <b>-0.998*</b>  |
|        |         | <i>p</i> |   |       |               |        | 0.064  | 0.090         | 0.049          | 0.173  | 0.025          | 0.035          | 0.031          | 0.371  | 0.038           | 0.037           | 0.037           |
|        | P       | <i>r</i> |   |       |               |        | 1      | <b>0.999*</b> | <b>1.000*</b>  | 0.985  | <b>-0.998*</b> | <b>-0.999*</b> | <b>-0.999*</b> | 0.886  | <b>0.999*</b>   | <b>0.999*</b>   | <b>0.999*</b>   |
|        |         | <i>p</i> |   |       |               |        |        | 0.026         | 0.015          | 0.109  | 0.039          | 0.028          | 0.033          | 0.307  | 0.026           | 0.026           | 0.027           |
|        | Na      | <i>r</i> |   |       |               |        |        | 1             | <b>0.998*</b>  | 0.991  | -0.995         | -0.996         | -0.996         | 0.904  | 0.997           | 0.997           | 0.997           |
|        |         | <i>p</i> |   |       |               |        |        |               | 0.041          | 0.083  | 0.065          | 0.055          | 0.059          | 0.281  | 0.053           | 0.053           | 0.053           |
|        | Ca      | <i>r</i> |   |       |               |        |        |               | 1              | 0.981  | <b>-0.999*</b> | <b>-1.000*</b> | <b>-1.000*</b> | 0.875  | <b>1.000*</b>   | <b>1.000*</b>   | <b>1.000*</b>   |
|        |         | <i>p</i> |   |       |               |        |        |               |                | 0.125  | 0.024          | 0.013          | 0.017          | 0.322  | 0.011           | 0.011           | 0.011           |
|        | Mg      | <i>r</i> |   |       |               |        |        |               |                | 1      | -0.973         | -0.977         | -0.975         | 0.952  | 0.977           | 0.977           | 0.977           |
|        |         | <i>p</i> |   |       |               |        |        |               |                |        | 0.149          | 0.138          | 0.142          | 0.198  | 0.136           | 0.136           | 0.136           |
|        | Fe      | <i>r</i> |   |       |               |        |        |               |                |        | 1              | <b>1.000*</b>  | <b>1.000**</b> | -0.856 | <b>-1.000*</b>  | <b>-1.000*</b>  | <b>-1.000*</b>  |
|        |         | <i>p</i> |   |       |               |        |        |               |                |        |                | 0.011          | 0.007          | 0.346  | 0.013           | 0.013           | 0.013           |
|        | Zn      | <i>r</i> |   |       |               |        |        |               |                |        |                | 1              | <b>1.000**</b> | -0.864 | <b>-1.000**</b> | <b>-1.000**</b> | <b>-1.000**</b> |
|        |         | <i>p</i> |   |       |               |        |        |               |                |        |                |                | 0.004          | 0.336  | 0.002           | 0.002           | 0.002           |
|        | Cu      | <i>r</i> |   |       |               |        |        |               |                |        |                |                | 1              | -0.861 | <b>-1.000**</b> | <b>-1.000**</b> | <b>-1.000**</b> |
|        |         | <i>p</i> |   |       |               |        |        |               |                |        |                |                |                | 0.340  | 0.006           | 0.006           | 0.006           |
|        | EO      | <i>r</i> |   |       |               |        |        |               |                |        |                |                |                | 1      | 0.866           | 0.866           | 0.866           |
|        |         | <i>p</i> |   |       |               |        |        |               |                |        |                |                |                |        | 0.334           | 0.334           | 0.334           |
| Spring | Phenols | <i>r</i> | 1 | 0.989 | 0.975         | -0.161 | 0.614  | 0.266         | -0.252         | -0.250 | 0.291          | -0.253         | -0.139         | 0.359  | 0.266           | 0.268           | 0.272           |
| Plain  |         | <i>p</i> |   | 0.095 | 0.142         | 0.897  | 0.580  | 0.829         | 0.838          | 0.839  | 0.812          | 0.837          | 0.911          | 0.766  | 0.829           | 0.827           | 0.825           |
|        | FRAP    | <i>r</i> |   | 1     | <b>0.997*</b> | -0.306 | 0.724  | 0.406         | -0.105         | -0.391 | 0.430          | -0.394         | -0.285         | 0.494  | 0.406           | 0.408           | 0.412           |
|        |         | <i>p</i> |   |       | 0.047         | 0.802  | 0.485  | 0.734         | 0.933          | 0.744  | 0.717          | 0.742          | 0.816          | 0.671  | 0.734           | 0.732           | 0.730           |

|      |          |   |        |        |        |                |                |                 |               |               |                 |                |                |                |                 |
|------|----------|---|--------|--------|--------|----------------|----------------|-----------------|---------------|---------------|-----------------|----------------|----------------|----------------|-----------------|
| ABTS | <i>r</i> | 1 | -0.376 | 0.773  | 0.473  | -0.031         | -0.458         | 0.495           | -0.460        | -0.355        | 0.556           | 0.473          | 0.474          | 0.478          | 0.473           |
|      | <i>p</i> |   | 0.755  | 0.438  | 0.687  | 0.980          | 0.697          | 0.670           | 0.695         | 0.769         | 0.624           | 0.687          | 0.685          | 0.683          | 0.687           |
| N    | <i>r</i> | 1 | -0.878 | -0.994 | -0.915 | 0.996          | -0.991         | 0.996           | <b>1.000*</b> | -0.979        | -0.994          | -0.994         | -0.994         | -0.994         | -0.994          |
|      | <i>p</i> |   | 0.317  | 0.068  | 0.265  | 0.058          | 0.085          | 0.059           | 0.014         | 0.130         | 0.068           | 0.069          | 0.072          | 0.068          | 0.068           |
| K    | <i>r</i> |   | 1      | 0.924  | 0.610  | -0.918         | 0.934          | -0.919          | -0.867        | 0.957         | 0.924           | 0.925          | 0.927          | 0.924          | 0.924           |
|      | <i>p</i> |   |        | 0.249  | 0.582  | 0.260          | 0.233          | 0.258           | 0.332         | 0.187         | 0.249           | 0.248          | 0.245          | 0.245          | 0.249           |
| P    | <i>r</i> |   |        | 1      | 0.866  | <b>-1.000*</b> | <b>1.000*</b>  | <b>-1.000**</b> | -0.992        | 0.995         | <b>1.000**</b>  | <b>1.000**</b> | <b>1.000**</b> | <b>1.000**</b> | <b>1.000**</b>  |
|      | <i>p</i> |   |        |        | 0.333  | 0.011          | 0.016          | 0.009           | 0.083         | 0.062         | 0.000           | 0.001          | 0.004          | 0.000          | 0.000           |
| Na   | <i>r</i> |   |        |        | 1      | -0.874         | 0.853          | -0.873          | -0.923        | 0.813         | 0.866           | 0.865          | 0.863          | 0.866          | 0.866           |
|      | <i>p</i> |   |        |        |        | 0.323          | 0.350          | 0.324           | 0.251         | 0.396         | 0.333           | 0.335          | 0.337          | 0.333          | 0.333           |
| Ca   | <i>r</i> |   |        |        |        | 1              | <b>-0.999*</b> | <b>1.000**</b>  | 0.994         | -0.993        | <b>-1.000*</b>  | <b>-1.000*</b> | <b>-1.000*</b> | <b>-1.000*</b> | <b>-1.000*</b>  |
|      | <i>p</i> |   |        |        |        |                | 0.027          | 0.002           | 0.072         | 0.073         | 0.011           | 0.012          | 0.014          | 0.011          | 0.011           |
| Mg   | <i>r</i> |   |        |        |        |                | 1              | <b>-0.999*</b>  | -0.988        | <b>0.997*</b> | <b>1.000*</b>   | <b>1.000*</b>  | <b>1.000*</b>  | <b>1.000*</b>  | <b>1.000*</b>   |
|      | <i>p</i> |   |        |        |        |                |                | 0.025           | 0.099         | 0.046         | 0.016           | 0.015          | 0.013          | 0.016          | 0.016           |
| Fe   | <i>r</i> |   |        |        |        |                |                | 1               | 0.993         | -0.994        | <b>-1.000**</b> | <b>-1.000*</b> | <b>-1.000*</b> | <b>-1.000*</b> | <b>-1.000**</b> |
|      | <i>p</i> |   |        |        |        |                |                |                 | 0.074         | 0.071         | 0.009           | 0.010          | 0.013          | 0.009          | 0.009           |
| Zn   | <i>r</i> |   |        |        |        |                |                |                 | 1             | -0.974        | -0.992          | -0.991         | -0.991         | -0.991         | -0.992          |
|      | <i>p</i> |   |        |        |        |                |                |                 |               | 0.145         | 0.083           | 0.084          | 0.086          | 0.083          | 0.083           |
| Cu   | <i>r</i> |   |        |        |        |                |                |                 |               | 1             | 0.995           | 0.995          | 0.996          | 0.995          | 0.995           |
|      | <i>p</i> |   |        |        |        |                |                |                 |               |               | 0.062           | 0.061          | 0.059          | 0.062          | 0.062           |
| EO   | <i>r</i> |   |        |        |        |                |                |                 |               |               | 1               | <b>1.000**</b> | <b>1.000**</b> | <b>1.000**</b> | <b>1.000**</b>  |
|      | <i>p</i> |   |        |        |        |                |                |                 |               |               |                 | 0.001          | 0.004          | 0.000          | 0.000           |

Statistically significant correlations are shown in bold letter (\* for  $p < 0.05$ , \*\* for  $p < 0.01$ ).

**Table S4.** Correlations coefficients and (*p*-values) between the antioxidant activity and essential oils components of spearmint.

|        |         | Phenols  | FRAP     | ABTS  | N      | K      | P      | Na     | Ca            | Mg             | Fe            | Zn     | Cu             | EO             | carvone        | dihydro<br>carveol | sabinene       |
|--------|---------|----------|----------|-------|--------|--------|--------|--------|---------------|----------------|---------------|--------|----------------|----------------|----------------|--------------------|----------------|
| Summer | Phenols | <i>r</i> | <i>1</i> | 0.399 | 0.900  | 0.062  | -0.055 | 0.155  | 0.000         | 0.140          | 0.172         | 0.979  | -0.100         | -0.109         | -0.115         | -0.036             | -0.013         |
| Mount. |         | <i>p</i> |          | 0.739 | 0.287  | 0.961  | 0.965  | 0.901  | 1.000         | 0.910          | 0.890         | 0.129  | 0.936          | 0.931          | 0.927          | 0.977              | 0.991          |
|        | FRAP    | <i>r</i> |          | 1     | -0.041 | -0.891 | -0.938 | 0.968  | -0.917        | 0.964          | 0.972         | 0.576  | -0.952         | -0.955         | -0.957         | -0.931             | -0.922         |
|        |         | <i>p</i> |          |       | 0.974  | 0.300  | 0.226  | 0.162  | 0.261         | 0.171          | 0.151         | 0.609  | 0.197          | 0.192          | 0.188          | 0.238              | 0.253          |
|        | ABTS    | <i>r</i> |          |       | 1      | 0.490  | 0.385  | -0.291 | 0.436         | -0.305         | -0.274        | 0.794  | 0.343          | 0.335          | 0.330          | 0.403              | 0.424          |
|        |         | <i>p</i> |          |       |        | 0.674  | 0.748  | 0.812  | 0.713         | 0.803          | 0.823         | 0.416  | 0.777          | 0.782          | 0.786          | 0.736              | 0.722          |
|        | N       | <i>r</i> |          |       |        | 1      | 0.993  | -0.977 | <b>0.998*</b> | -0.980         | -0.973        | -0.141 | 0.987          | 0.985          | 0.984          | 0.995              | <b>0.997*</b>  |
|        |         | <i>p</i> |          |       |        |        | 0.074  | 0.138  | 0.039         | 0.129          | 0.150         | 0.910  | 0.103          | 0.109          | 0.112          | 0.062              | 0.048          |
|        | K       | <i>r</i> |          |       |        |        | 1      | -0.995 | <b>0.998*</b> | -0.996         | -0.993        | -0.256 | <b>0.999*</b>  | <b>0.999*</b>  | <b>0.998*</b>  | <b>1.000*</b>      | <b>0.999*</b>  |
|        |         | <i>p</i> |          |       |        |        |        | 0.064  | 0.035         | 0.055          | 0.075         | 0.835  | 0.029          | 0.034          | 0.038          | 0.012              | 0.027          |
|        | P       | <i>r</i> |          |       |        |        |        | 1      | -0.988        | <b>1.000**</b> | <b>1.000*</b> | 0.351  | <b>-0.999*</b> | <b>-0.999*</b> | <b>-0.999*</b> | -0.993             | -0.990         |
|        |         | <i>p</i> |          |       |        |        |        |        | 0.099         | 0.009          | 0.011         | 0.772  | 0.035          | 0.029          | 0.026          | 0.076              | 0.090          |
|        | Na      | <i>r</i> |          |       |        |        |        |        | 1             | -0.990         | -0.985        | -0.202 | 0.995          | 0.994          | 0.993          | <b>0.999*</b>      | <b>1.000**</b> |
|        |         | <i>p</i> |          |       |        |        |        |        |               | 0.090          | 0.110         | 0.871  | 0.064          | 0.069          | 0.073          | 0.023              | 0.009          |
|        | Ca      | <i>r</i> |          |       |        |        |        |        |               | 1              | <b>0.999*</b> | 0.337  | <b>-0.999*</b> | <b>-0.999*</b> | <b>-1.000*</b> | -0.994             | -0.992         |
|        |         | <i>p</i> |          |       |        |        |        |        |               |                | 0.021         | 0.781  | 0.026          | 0.020          | 0.017          | 0.067              | 0.081          |
|        | Mg      | <i>r</i> |          |       |        |        |        |        |               |                | 1             | 0.368  | <b>-0.997*</b> | <b>-0.998*</b> | <b>-0.998*</b> | -0.991             | -0.987         |
|        |         | <i>p</i> |          |       |        |        |        |        |               |                |               | 0.760  | 0.046          | 0.041          | 0.037          | 0.087              | 0.102          |
|        | Fe      | <i>r</i> |          |       |        |        |        |        |               |                |               | 1      | -0.299         | -0.307         | -0.313         | -0.237             | -0.215         |
|        |         | <i>p</i> |          |       |        |        |        |        |               |                |               |        | 0.807          | 0.801          | 0.797          | 0.848              | 0.862          |
|        | Zn      | <i>r</i> |          |       |        |        |        |        |               |                |               |        | 1              | <b>1.000**</b> | <b>1.000**</b> | <b>0.998*</b>      | <b>0.998*</b>  |
|        |         | <i>p</i> |          |       |        |        |        |        |               |                |               |        |                | 0.005          | 0.009          | 0.041              | 0.056          |
|        | Cu      | <i>r</i> |          |       |        |        |        |        |               |                |               |        |                | 1              | <b>1.000**</b> | <b>0.997*</b>      | <b>0.997*</b>  |
|        |         | <i>p</i> |          |       |        |        |        |        |               |                |               |        |                |                | 0.004          | 0.047              | 0.061          |

|        |         |          |          |       |               |        |        |               |               |        |               |                |                |                 |                 |               |               |                |
|--------|---------|----------|----------|-------|---------------|--------|--------|---------------|---------------|--------|---------------|----------------|----------------|-----------------|-----------------|---------------|---------------|----------------|
|        | EO      | <i>r</i> |          |       |               |        |        |               |               |        |               |                |                |                 | 1               | 0.997         | <b>0.997*</b> | 0.995          |
|        |         | <i>p</i> |          |       |               |        |        |               |               |        |               |                |                |                 |                 | 0.050         | 0.050         | 0.065          |
| Autumn | Phenols | <i>r</i> | <b>1</b> | 0.983 | <b>0.999*</b> | -0.772 | 0.875  | -0.812        | <b>0.997*</b> | -0.717 | -0.791        | -0.815         | 0.831          | -0.823          | 0.808           | 0.867         | 0.867         | 0.862          |
| Mount. |         | <i>p</i> |          | 0.117 | 0.032         | 0.438  | 0.321  | 0.397         | 0.049         | 0.491  | 0.420         | 0.394          | 0.376          | 0.384           | 0.402           | 0.332         | 0.332         | 0.338          |
|        | FRAP    | <i>r</i> |          | 1     | 0.973         | -0.876 | 0.949  | -0.905        | 0.994         | -0.832 | -0.890        | -0.907         | 0.919          | -0.913          | 0.902           | 0.944         | 0.944         | 0.940          |
|        |         | <i>p</i> |          |       | 0.149         | 0.321  | 0.204  | 0.280         | 0.069         | 0.374  | 0.302         | 0.276          | 0.259          | 0.267           | 0.284           | 0.214         | 0.215         | 0.221          |
|        | ABTS    | <i>r</i> |          |       | 1             | -0.740 | 0.850  | -0.782        | 0.992         | -0.681 | -0.759        | -0.785         | 0.802          | -0.794          | 0.777           | 0.841         | 0.841         | 0.836          |
|        |         | <i>p</i> |          |       |               | 0.470  | 0.353  | 0.429         | 0.081         | 0.523  | 0.451         | 0.425          | 0.408          | 0.416           | 0.433           | 0.364         | 0.364         | 0.370          |
|        | N       | <i>r</i> |          |       |               | 1      | -0.983 | <b>0.998*</b> | -0.819        | 0.997  | <b>1.000*</b> | <b>0.998*</b>  | -0.995         | 0.996           | <b>-0.998*</b>  | -0.986        | -0.986        | -0.988         |
|        |         | <i>p</i> |          |       |               |        | 0.117  | 0.041         | 0.389         | 0.053  | 0.019         | 0.045          | 0.062          | 0.054           | 0.037           | 0.106         | 0.106         | 0.100          |
|        | K       | <i>r</i> |          |       |               |        | 1      | -0.993        | 0.910         | -0.964 | -0.988        | -0.994         | 0.996          | -0.995          | 0.992           | <b>1.000*</b> | <b>1.000*</b> | <b>1.000*</b>  |
|        |         | <i>p</i> |          |       |               |        |        | 0.076         | 0.272         | 0.170  | 0.098         | 0.073          | 0.055          | 0.063           | 0.080           | 0.011         | 0.011         | 0.017          |
|        | P       | <i>r</i> |          |       |               |        |        | 1             | -0.854        | 0.989  | <b>0.999*</b> | <b>1.000**</b> | <b>-0.999*</b> | <b>1.000*</b>   | <b>-1.000**</b> | -0.995        | -0.995        | -0.996         |
|        |         | <i>p</i> |          |       |               |        |        |               | 0.348         | 0.094  | 0.023         | 0.003          | 0.021          | 0.013           | 0.005           | 0.065         | 0.065         | 0.059          |
|        | Na      | <i>r</i> |          |       |               |        |        |               | 1             | -0.768 | -0.835        | -0.857         | 0.871          | -0.864          | 0.850           | 0.903         | 0.903         | 0.899          |
|        |         | <i>p</i> |          |       |               |        |        |               |               | 0.443  | 0.371         | 0.345          | 0.327          | 0.335           | 0.353           | 0.283         | 0.283         | 0.289          |
|        | Ca      | <i>r</i> |          |       |               |        |        |               |               | 1      | 0.994         | 0.988          | -0.984         | 0.986           | -0.990          | -0.969        | -0.969        | -0.971         |
|        |         | <i>p</i> |          |       |               |        |        |               |               |        | 0.072         | 0.098          | 0.115          | 0.107           | 0.090           | 0.160         | 0.159         | 0.153          |
|        | Mg      | <i>r</i> |          |       |               |        |        |               |               |        | 1             | <b>0.999*</b>  | <b>-0.998*</b> | <b>0.998*</b>   | <b>-1.000*</b>  | -0.991        | -0.991        | -0.992         |
|        |         | <i>p</i> |          |       |               |        |        |               |               |        |               | 0.026          | 0.044          | 0.035           | 0.018           | 0.088         | 0.087         | 0.081          |
|        | Fe      | <i>r</i> |          |       |               |        |        |               |               |        |               | 1              | <b>-1.000*</b> | <b>1.000**</b>  | <b>-1.000**</b> | -0.995        | -0.995        | -0.996         |
|        |         | <i>p</i> |          |       |               |        |        |               |               |        |               |                | 0.018          | 0.009           | 0.008           | 0.062         | 0.062         | 0.056          |
|        | Zn      | <i>r</i> |          |       |               |        |        |               |               |        |               |                | 1              | <b>-1.000**</b> | <b>0.999*</b>   | <b>0.998*</b> | <b>0.998*</b> | <b>0.998*</b>  |
|        |         | <i>p</i> |          |       |               |        |        |               |               |        |               |                |                | 0.008           | 0.026           | 0.044         | 0.044         | 0.038          |
|        | Cu      | <i>r</i> |          |       |               |        |        |               |               |        |               |                |                | 1               | <b>-1.000*</b>  | -0.997        | -0.997        | <b>-0.997*</b> |
|        |         | <i>p</i> |          |       |               |        |        |               |               |        |               |                |                |                 | 0.017           | 0.052         | 0.052         | 0.046          |
|        | EO      | <i>r</i> |          |       |               |        |        |               |               |        |               |                |                |                 | 1               | 0.994         | 0.994         | 0.995          |

|        |         |          |          |        |        |        |        |                |                |               |                |                 |                |                |        |                |                |                |
|--------|---------|----------|----------|--------|--------|--------|--------|----------------|----------------|---------------|----------------|-----------------|----------------|----------------|--------|----------------|----------------|----------------|
|        |         | <i>p</i> |          |        |        |        |        |                |                |               |                |                 |                |                |        | 0.070          | 0.070          | 0.063          |
| Winter | Phenols | <i>r</i> | <i>1</i> | -0.993 | 0.995  | -0.881 | -0.094 | -0.877         | 0.845          | 0.803         | -0.878         | -0.852          | 0.841          | 0.841          | -0.728 | -0.884         | -0.884         | -0.884         |
| Mount. |         | <i>p</i> |          | 0.075  | 0.064  | 0.313  | 0.940  | 0.319          | 0.360          | 0.407         | 0.317          | 0.351           | 0.364          | 0.363          | 0.481  | 0.309          | 0.309          | 0.310          |
|        | FRAP    | <i>r</i> |          | 1      | -0.976 | 0.820  | 0.210  | 0.815          | -0.776         | -0.727        | 0.816          | 0.784           | -0.772         | -0.772         | 0.642  | 0.823          | 0.823          | 0.823          |
|        |         | <i>p</i> |          |        | 0.139  | 0.388  | 0.865  | 0.394          | 0.435          | 0.482         | 0.392          | 0.426           | 0.439          | 0.438          | 0.556  | 0.384          | 0.384          | 0.385          |
|        | ABTS    | <i>r</i> |          |        | 1      | -0.924 | 0.007  | -0.921         | 0.894          | 0.859         | -0.922         | -0.900          | 0.891          | 0.891          | -0.793 | -0.927         | -0.927         | -0.927         |
|        |         | <i>p</i> |          |        |        | 0.249  | 0.996  | 0.255          | 0.296          | 0.343         | 0.253          | 0.287           | 0.300          | 0.299          | 0.417  | 0.245          | 0.245          | 0.245          |
|        | N       | <i>r</i> |          |        |        | 1      | -0.388 | <b>1.000**</b> | <b>-0.997*</b> | -0.989        | <b>1.000**</b> | <b>0.998*</b>   | -0.997         | -0.997         | 0.966  | <b>1.000**</b> | <b>1.000**</b> | <b>1.000**</b> |
|        |         | <i>p</i> |          |        |        |        | 0.746  | 0.006          | 0.046          | 0.093         | 0.004          | 0.038           | 0.050          | 0.050          | 0.167  | 0.004          | 0.004          | 0.004          |
|        | K       | <i>r</i> |          |        |        |        | 1      | -0.396         | 0.454          | 0.518         | -0.394         | -0.442          | 0.460          | 0.459          | -0.614 | -0.382         | -0.382         | -0.382         |
|        |         | <i>p</i> |          |        |        |        |        | 0.741          | 0.700          | 0.653         | 0.742          | 0.709           | 0.696          | 0.696          | 0.579  | 0.750          | 0.750          | 0.750          |
|        | P       | <i>r</i> |          |        |        |        |        | 1              | <b>-0.998*</b> | -0.991        | <b>1.000**</b> | <b>0.999*</b>   | <b>-0.998*</b> | <b>-0.998*</b> | 0.968  | <b>1.000**</b> | <b>1.000**</b> | <b>1.000**</b> |
|        |         | <i>p</i> |          |        |        |        |        |                | 0.041          | 0.088         | 0.002          | 0.032           | 0.045          | 0.044          | 0.162  | 0.010          | 0.010          | 0.009          |
|        | Na      | <i>r</i> |          |        |        |        |        |                | 1              | <b>0.997*</b> | <b>-0.998*</b> | <b>-1.000**</b> | <b>1.000**</b> | <b>1.000**</b> | -0.982 | -0.997         | -0.997         | -0.997         |
|        |         | <i>p</i> |          |        |        |        |        |                |                | 0.047         | 0.042          | 0.009           | 0.004          | 0.004          | 0.121  | 0.050          | 0.050          | 0.050          |
|        | Ca      | <i>r</i> |          |        |        |        |        |                |                | 1             | -0.990         | -0.996          | <b>0.998*</b>  | <b>0.998*</b>  | -0.993 | -0.988         | -0.988         | -0.988         |
|        |         | <i>p</i> |          |        |        |        |        |                |                |               | 0.089          | 0.056           | 0.043          | 0.043          | 0.074  | 0.097          | 0.097          | 0.097          |
|        | Mg      | <i>r</i> |          |        |        |        |        |                |                |               | 1              | <b>0.999*</b>   | <b>-0.997*</b> | <b>-0.997*</b> | 0.967  | <b>1.000**</b> | <b>1.000**</b> | <b>1.000**</b> |
|        |         | <i>p</i> |          |        |        |        |        |                |                |               |                | 0.034           | 0.046          | 0.046          | 0.163  | 0.008          | 0.008          | 0.008          |
|        | Fe      | <i>r</i> |          |        |        |        |        |                |                |               |                | 1               | <b>-1.000*</b> | <b>-1.000*</b> | 0.979  | <b>0.998*</b>  | <b>0.998*</b>  | <b>0.998*</b>  |
|        |         | <i>p</i> |          |        |        |        |        |                |                |               |                |                 | 0.013          | 0.012          | 0.130  | 0.042          | 0.042          | 0.042          |
|        | Zn      | <i>r</i> |          |        |        |        |        |                |                |               |                |                 | 1              | <b>1.000**</b> | -0.983 | -0.996         | -0.996         | -0.996         |
|        |         | <i>p</i> |          |        |        |        |        |                |                |               |                |                 |                | 0.000          | 0.117  | 0.054          | 0.054          | 0.054          |
|        | Cu      | <i>r</i> |          |        |        |        |        |                |                |               |                |                 |                | 1              | -0.983 | -0.996         | -0.996         | -0.996         |
|        |         | <i>p</i> |          |        |        |        |        |                |                |               |                |                 |                |                | 0.117  | 0.054          | 0.054          | 0.054          |
|        | EO      | <i>r</i> |          |        |        |        |        |                |                |               |                |                 |                |                | 1      | 0.964          | 0.964          | 0.964          |
|        |         | <i>p</i> |          |        |        |        |        |                |                |               |                |                 |                |                |        | 0.171          | 0.171          | 0.171          |

|        |         |          |          |       |        |        |        |                |        |               |               |        |                |                |                 |        |                 |        |
|--------|---------|----------|----------|-------|--------|--------|--------|----------------|--------|---------------|---------------|--------|----------------|----------------|-----------------|--------|-----------------|--------|
| Spring | Phenols | <i>r</i> | <i>1</i> | 0.979 | -0.049 | -0.278 | -0.530 | -0.520         | -0.904 | -0.544        | -0.455        | 0.621  | -0.533         | -0.565         | 0.536           | 0.730  | 0.569           | -0.356 |
| Mount. |         | <i>p</i> |          | 0.130 | 0.969  | 0.821  | 0.645  | 0.652          | 0.282  | 0.633         | 0.700         | 0.573  | 0.642          | 0.618          | 0.640           | 0.479  | 0.615           | 0.768  |
|        | FRAP    | <i>r</i> |          | 1     | -0.252 | -0.468 | -0.691 | -0.683         | -0.972 | -0.704        | -0.626        | 0.768  | -0.694         | -0.721         | 0.697           | 0.854  | 0.724           | -0.539 |
|        |         | <i>p</i> |          |       | 0.838  | 0.690  | 0.514  | 0.522          | 0.152  | 0.503         | 0.569         | 0.443  | 0.511          | 0.487          | 0.509           | 0.349  | 0.484           | 0.638  |
|        | ABTS    | <i>r</i> |          |       | 1      | 0.973  | 0.873  | 0.879          | 0.473  | 0.865         | 0.912         | -0.813 | 0.871          | 0.852          | -0.870          | -0.719 | -0.849          | 0.951  |
|        |         | <i>p</i> |          |       |        | 0.148  | 0.324  | 0.317          | 0.687  | 0.335         | 0.269         | 0.395  | 0.327          | 0.351          | 0.329           | 0.489  | 0.354           | 0.200  |
|        | N       | <i>r</i> |          |       |        | 1      | 0.962  | 0.965          | 0.663  | 0.957         | 0.982         | -0.925 | 0.961          | 0.950          | -0.960          | -0.860 | -0.948          | 0.997  |
|        |         | <i>p</i> |          |       |        |        | 0.176  | 0.169          | 0.539  | 0.187         | 0.121         | 0.247  | 0.179          | 0.203          | 0.181           | 0.341  | 0.206           | 0.052  |
|        | K       | <i>r</i> |          |       |        |        | 1      | <b>1.000**</b> | 0.842  | <b>1.000*</b> | 0.996         | -0.994 | <b>1.000**</b> | <b>0.999*</b>  | <b>-1.000**</b> | -0.966 | <b>-0.999*</b>  | 0.981  |
|        |         | <i>p</i> |          |       |        |        |        | 0.007          | 0.363  | 0.011         | 0.055         | 0.071  | 0.003          | 0.027          | 0.005           | 0.165  | 0.030           | 0.124  |
|        | P       | <i>r</i> |          |       |        |        |        | 1              | 0.836  | <b>1.000*</b> | <b>0.997*</b> | -0.992 | <b>1.000*</b>  | <b>0.999*</b>  | <b>-1.000*</b>  | -0.963 | <b>-0.998*</b>  | 0.983  |
|        |         | <i>p</i> |          |       |        |        |        |                | 0.370  | 0.019         | 0.048         | 0.079  | 0.010          | 0.034          | 0.012           | 0.173  | 0.037           | 0.116  |
|        | Na      | <i>r</i> |          |       |        |        |        |                | 1      | 0.851         | 0.792         | -0.897 | 0.844          | 0.864          | -0.846          | -0.952 | -0.867          | 0.722  |
|        |         | <i>p</i> |          |       |        |        |        |                |        | 0.352         | 0.418         | 0.291  | 0.360          | 0.336          | 0.358           | 0.197  | 0.333           | 0.486  |
|        | Ca      | <i>r</i> |          |       |        |        |        |                |        | 1             | 0.995         | -0.996 | <b>1.000**</b> | <b>1.000*</b>  | <b>-1.000**</b> | -0.971 | <b>-1.000*</b>  | 0.978  |
|        |         | <i>p</i> |          |       |        |        |        |                |        |               | 0.066         | 0.060  | 0.008          | 0.016          | 0.006           | 0.154  | 0.019           | 0.135  |
|        | Mg      | <i>r</i> |          |       |        |        |        |                |        |               | 1             | -0.980 | 0.996          | 0.992          | -0.996          | -0.941 | -0.991          | 0.994  |
|        |         | <i>p</i> |          |       |        |        |        |                |        |               |               | 0.126  | 0.058          | 0.082          | 0.060           | 0.220  | 0.085           | 0.069  |
|        | Fe      | <i>r</i> |          |       |        |        |        |                |        |               |               | 1      | -0.994         | <b>-0.998*</b> | 0.995           | 0.989  | <b>0.998*</b>   | -0.953 |
|        |         | <i>p</i> |          |       |        |        |        |                |        |               |               |        | 0.069          | 0.044          | 0.067           | 0.094  | 0.041           | 0.195  |
|        | Zn      | <i>r</i> |          |       |        |        |        |                |        |               |               |        | 1              | <b>0.999*</b>  | <b>-1.000**</b> | -0.968 | <b>-0.999*</b>  | 0.980  |
|        |         | <i>p</i> |          |       |        |        |        |                |        |               |               |        |                | 0.024          | 0.002           | 0.163  | 0.027           | 0.126  |
|        | Cu      | <i>r</i> |          |       |        |        |        |                |        |               |               |        |                | 1              | <b>-0.999*</b>  | -0.976 | <b>-1.000**</b> | 0.972  |
|        |         | <i>p</i> |          |       |        |        |        |                |        |               |               |        |                |                | 0.022           | 0.138  | 0.003           | 0.151  |
|        | EO      | <i>r</i> |          |       |        |        |        |                |        |               |               |        |                |                | 1               | 0.968  | <b>0.999*</b>   | -0.980 |
|        |         | <i>p</i> |          |       |        |        |        |                |        |               |               |        |                |                |                 | 0.161  | 0.025           | 0.128  |
|        | Phenols | <i>r</i> | <i>1</i> | 0.030 | -0.893 | 0.892  | 0.640  | 0.613          | 0.731  | 0.136         | -0.547        | 0.929  | 0.592          | -0.577         | -0.576          | -0.444 | -0.583          | 0.639  |

|        |         |          |          |       |       |                 |                |                |                |        |        |        |                |                |                |        |                 |                |
|--------|---------|----------|----------|-------|-------|-----------------|----------------|----------------|----------------|--------|--------|--------|----------------|----------------|----------------|--------|-----------------|----------------|
| Summer |         | <i>p</i> |          | 0.981 | 0.297 | 0.299           | 0.558          | 0.580          | 0.478          | 0.913  | 0.632  | 0.241  | 0.597          | 0.609          | 0.609          | 0.707  | 0.604           | 0.558          |
| Plain  | FRAP    | <i>r</i> |          | 1     | 0.422 | -0.426          | -0.749         | -0.771         | -0.660         | 0.994  | 0.821  | -0.341 | -0.788         | 0.799          | 0.800          | 0.882  | 0.795           | -0.749         |
|        |         | <i>p</i> |          |       | 0.722 | 0.720           | 0.461          | 0.439          | 0.541          | 0.068  | 0.387  | 0.778  | 0.422          | 0.411          | 0.410          | 0.312  | 0.415           | 0.461          |
|        | ABTS    | <i>r</i> |          |       | 1     | <b>-1.000**</b> | -0.917         | -0.903         | -0.960         | 0.324  | 0.865  | -0.996 | -0.891         | 0.882          | 0.882          | 0.799  | 0.886           | -0.917         |
|        |         | <i>p</i> |          |       |       | 0.003           | 0.261          | 0.283          | 0.181          | 0.790  | 0.335  | 0.056  | 0.300          | 0.312          | 0.312          | 0.410  | 0.307           | 0.262          |
|        | N       | <i>r</i> |          |       |       | 1               | 0.919          | 0.904          | 0.961          | -0.327 | -0.867 | 0.996  | 0.893          | -0.884         | -0.884         | -0.802 | -0.888          | 0.918          |
|        |         | <i>p</i> |          |       |       |                 | 0.258          | 0.281          | 0.179          | 0.788  | 0.332  | 0.059  | 0.297          | 0.309          | 0.310          | 0.408  | 0.305           | 0.259          |
|        | K       | <i>r</i> |          |       |       |                 | 1              | <b>0.999*</b>  | 0.992          | -0.674 | -0.993 | 0.879  | <b>0.998*</b>  | -0.997         | -0.997         | -0.973 | <b>-0.997*</b>  | <b>1.000**</b> |
|        |         | <i>p</i> |          |       |       |                 |                | 0.022          | 0.079          | 0.529  | 0.074  | 0.317  | 0.039          | 0.051          | 0.052          | 0.149  | 0.046           | 0.001          |
|        | P       | <i>r</i> |          |       |       |                 |                | 1              | 0.987          | -0.699 | -0.997 | 0.861  | <b>1.000*</b>  | <b>-0.999*</b> | <b>-0.999*</b> | -0.980 | <b>-0.999*</b>  | <b>0.999*</b>  |
|        |         | <i>p</i> |          |       |       |                 |                |                | 0.102          | 0.507  | 0.052  | 0.339  | 0.017          | 0.029          | 0.029          | 0.127  | 0.024           | 0.021          |
|        | Na      | <i>r</i> |          |       |       |                 |                |                | 1              | -0.577 | -0.971 | 0.931  | 0.983          | -0.979         | -0.979         | -0.936 | -0.981          | 0.992          |
|        |         | <i>p</i> |          |       |       |                 |                |                |                | 0.609  | 0.154  | 0.237  | 0.119          | 0.130          | 0.131          | 0.229  | 0.126           | 0.080          |
|        | Ca      | <i>r</i> |          |       |       |                 |                |                |                | 1      | 0.755  | -0.239 | -0.718         | 0.731          | 0.731          | 0.827  | 0.726           | -0.675         |
|        |         | <i>p</i> |          |       |       |                 |                |                |                |        | 0.455  | 0.846  | 0.490          | 0.478          | 0.478          | 0.380  | 0.483           | 0.529          |
|        | Mg      | <i>r</i> |          |       |       |                 |                |                |                |        | 1      | -0.817 | <b>-0.998*</b> | <b>0.999*</b>  | <b>0.999*</b>  | 0.993  | <b>0.999*</b>   | -0.993         |
|        |         | <i>p</i> |          |       |       |                 |                |                |                |        |        | 0.391  | 0.035          | 0.023          | 0.023          | 0.075  | 0.028           | 0.073          |
|        | Fe      | <i>r</i> |          |       |       |                 |                |                |                |        |        | 1      | 0.848          | -0.838         | -0.837         | -0.744 | -0.841          | 0.878          |
|        |         | <i>p</i> |          |       |       |                 |                |                |                |        |        |        | 0.356          | 0.368          | 0.368          | 0.466  | 0.363           | 0.318          |
|        | Zn      | <i>r</i> |          |       |       |                 |                |                |                |        |        |        | 1              | <b>-1.000*</b> | <b>-1.000*</b> | -0.985 | <b>-1.000**</b> | <b>0.998*</b>  |
|        |         | <i>p</i> |          |       |       |                 |                |                |                |        |        |        |                | 0.012          | 0.012          | 0.110  | 0.007           | 0.038          |
|        | Cu      | <i>r</i> |          |       |       |                 |                |                |                |        |        |        |                | 1              | <b>1.000**</b> | 0.988  | <b>1.000**</b>  | -0.997         |
|        |         | <i>p</i> |          |       |       |                 |                |                |                |        |        |        |                |                | 0.001          | 0.098  | 0.005           | 0.050          |
|        | EO      | <i>r</i> |          |       |       |                 |                |                |                |        |        |        |                |                | 1              | 0.988  | <b>1.000**</b>  | -0.997         |
|        |         | <i>p</i> |          |       |       |                 |                |                |                |        |        |        |                |                |                | 0.098  | 0.005           | 0.051          |
| Autumn | Phenols | <i>r</i> | <b>1</b> | 0.957 | 0.918 | -0.988          | <b>-0.998*</b> | <b>-0.999*</b> | . <sup>a</sup> | 0.994  | 0.991  | 0.972  | <b>-0.998*</b> | 0.996          | <b>0.997*</b>  | 0.988  | 0.991           | 0.987          |
| Plain  |         | <i>p</i> |          | 0.186 | 0.260 | 0.097           | 0.044          | 0.028          |                | 0.068  | 0.086  | 0.151  | 0.042          | 0.055          | 0.048          | 0.098  | 0.086           | 0.103          |

|        |         |          |          |       |        |        |        |                |                |                |                |                |                |                 |                |                |                |
|--------|---------|----------|----------|-------|--------|--------|--------|----------------|----------------|----------------|----------------|----------------|----------------|-----------------|----------------|----------------|----------------|
|        | FRAP    | <i>r</i> | 1        | 0.764 | -0.903 | -0.935 | -0.969 | . <sup>a</sup> | 0.983          | 0.988          | <b>0.998*</b>  | -0.974         | 0.979          | 0.976           | 0.990          | 0.988          | 0.991          |
|        |         | <i>p</i> |          | 0.446 | 0.283  | 0.230  | 0.158  |                | 0.118          | 0.100          | 0.035          | 0.145          | 0.132          | 0.139           | 0.088          | 0.100          | 0.084          |
|        | ABTS    | <i>r</i> |          | 1     | -0.967 | -0.943 | -0.899 | . <sup>a</sup> | 0.870          | 0.856          | 0.799          | -0.890         | 0.880          | 0.885           | 0.846          | 0.856          | 0.842          |
|        |         | <i>p</i> |          |       | 0.163  | 0.216  | 0.288  |                | 0.328          | 0.346          | 0.411          | 0.302          | 0.315          | 0.308           | 0.358          | 0.346          | 0.363          |
|        | N       | <i>r</i> |          |       | 1      | 0.997  | 0.981  | . <sup>a</sup> | -0.967         | -0.959         | -0.925         | 0.976          | -0.972         | -0.974          | -0.953         | -0.959         | -0.951         |
|        |         | <i>p</i> |          |       |        | 0.053  | 0.125  |                | 0.165          | 0.183          | 0.248          | 0.139          | 0.151          | 0.144           | 0.195          | 0.183          | 0.199          |
|        | K       | <i>r</i> |          |       |        | 1      | 0.994  | . <sup>a</sup> | -0.985         | -0.979         | -0.954         | 0.991          | -0.988         | -0.990          | -0.975         | -0.979         | -0.974         |
|        |         | <i>p</i> |          |       |        |        | 0.072  |                | 0.112          | 0.130          | 0.195          | 0.085          | 0.098          | 0.091           | 0.142          | 0.130          | 0.146          |
|        | P       | <i>r</i> |          |       |        |        | 1      | . <sup>a</sup> | <b>-0.998*</b> | -0.996         | -0.981         | <b>1.000*</b>  | <b>-0.999*</b> | <b>-1.000*</b>  | -0.994         | -0.996         | -0.993         |
|        |         | <i>p</i> |          |       |        |        |        |                | 0.040          | 0.058          | 0.123          | 0.013          | 0.026          | 0.019           | 0.070          | 0.058          | 0.074          |
|        | Na      | <i>r</i> |          |       |        |        |        | . <sup>a</sup>  | . <sup>a</sup> | . <sup>a</sup> | . <sup>a</sup> |
|        |         | <i>p</i> |          |       |        |        |        |                |                |                |                |                |                |                 |                |                |                |
|        | Ca      | <i>r</i> |          |       |        |        |        |                | 1              | <b>1.000*</b>  | 0.992          | <b>-0.999*</b> | <b>1.000*</b>  | <b>0.999*</b>   | <b>0.999*</b>  | <b>1.000*</b>  | <b>0.999*</b>  |
|        |         | <i>p</i> |          |       |        |        |        |                |                | 0.018          | 0.083          | 0.026          | 0.014          | 0.021           | 0.030          | 0.018          | 0.034          |
|        | Mg      | <i>r</i> |          |       |        |        |        |                |                | 1              | 0.995          | <b>-0.998*</b> | <b>0.999*</b>  | <b>0.998*</b>   | <b>1.000*</b>  | <b>1.000**</b> | <b>1.000*</b>  |
|        |         | <i>p</i> |          |       |        |        |        |                |                |                | 0.065          | 0.044          | 0.031          | 0.038           | 0.012          | 0.000          | 0.017          |
|        | Fe      | <i>r</i> |          |       |        |        |        |                |                |                | 1              | -0.985         | 0.989          | 0.987           | 0.997          | 0.995          | <b>0.997*</b>  |
|        |         | <i>p</i> |          |       |        |        |        |                |                |                |                | 0.109          | 0.097          | 0.104           | 0.053          | 0.065          | 0.049          |
|        | Zn      | <i>r</i> |          |       |        |        |        |                |                |                |                | 1              | <b>-1.000*</b> | <b>-1.000**</b> | -0.996         | <b>-0.998*</b> | -0.995         |
|        |         | <i>p</i> |          |       |        |        |        |                |                |                |                |                | 0.013          | 0.006           | 0.056          | 0.044          | 0.061          |
|        | Cu      | <i>r</i> |          |       |        |        |        |                |                |                |                |                | 1              | <b>1.000**</b>  | <b>0.998*</b>  | <b>0.999*</b>  | <b>0.997*</b>  |
|        |         | <i>p</i> |          |       |        |        |        |                |                |                |                |                |                | 0.007           | 0.043          | 0.032          | 0.048          |
|        | EO      | <i>r</i> |          |       |        |        |        |                |                |                |                |                |                | 1               | 0.997          | <b>0.998*</b>  | 0.996          |
|        |         | <i>p</i> |          |       |        |        |        |                |                |                |                |                |                |                 | 0.050          | 0.039          | 0.055          |
| Winter | Phenols | <i>r</i> | <b>1</b> | 0.871 | 0.790  | 0.138  | 0.132  | 0.238          | 0.094          | 0.066          | 0.229          | 0.060          | 0.048          | 0.144           | 0.464          | 0.038          | 0.039          |
| Plain  |         | <i>p</i> |          | 0.327 | 0.421  | 0.912  | 0.916  | 0.847          | 0.940          | 0.958          | 0.853          | 0.962          | 0.969          | 0.908           | 0.693          | 0.976          | 0.975          |
|        | FRAP    | <i>r</i> |          | 1     | 0.386  | -0.366 | -0.373 | 0.684          | -0.408         | -0.433         | -0.279         | -0.439         | -0.449         | -0.361          | 0.839          | 0.524          | 0.525          |



|        |         |          |          |       |       |                |        |               |               |        |                |                |                |        |        |        |        |
|--------|---------|----------|----------|-------|-------|----------------|--------|---------------|---------------|--------|----------------|----------------|----------------|--------|--------|--------|--------|
|        |         | <i>p</i> |          | 0.748 | 0.761 | 0.757          | 0.520  | 0.732         | 0.715         | 0.820  | 0.711          | 0.704          | 0.765          | 0.366  | 0.649  | 0.649  | 0.648  |
|        | ABTS    | <i>r</i> |          | 1     | 0.717 | 0.712          | -0.408 | 0.685         | 0.664         | 0.778  | 0.660          | 0.651          | 0.721          | -0.177 | -0.583 | -0.583 | -0.582 |
|        |         | <i>p</i> |          |       | 0.491 | 0.495          | 0.732  | 0.520         | 0.538         | 0.432  | 0.541          | 0.549          | 0.487          | 0.887  | 0.604  | 0.604  | 0.604  |
|        | N       | <i>r</i> |          |       | 1     | <b>1.000**</b> | -0.929 | <b>0.999*</b> | <b>0.997*</b> | 0.996  | 0.997          | 0.996          | <b>1.000**</b> | -0.813 | -0.984 | -0.984 | -0.984 |
|        |         | <i>p</i> |          |       |       | 0.004          | 0.241  | 0.029         | 0.047         | 0.059  | 0.050          | 0.058          | 0.004          | 0.396  | 0.113  | 0.113  | 0.113  |
|        | K       | <i>r</i> |          |       |       | 1              | -0.932 | <b>0.999*</b> | <b>0.998*</b> | 0.995  | <b>0.997*</b>  | 0.997          | <b>1.000**</b> | -0.817 | -0.986 | -0.986 | -0.985 |
|        |         | <i>p</i> |          |       |       |                | 0.237  | 0.024         | 0.042         | 0.063  | 0.046          | 0.053          | 0.008          | 0.391  | 0.108  | 0.108  | 0.109  |
|        | P       | <i>r</i> |          |       |       |                | 1      | -0.945        | -0.954        | -0.891 | -0.955         | -0.959         | -0.927         | 0.971  | 0.980  | 0.980  | 0.980  |
|        |         | <i>p</i> |          |       |       |                |        | 0.212         | 0.194         | 0.300  | 0.191          | 0.184          | 0.245          | 0.154  | 0.128  | 0.129  | 0.128  |
|        | Na      | <i>r</i> |          |       |       |                |        | 1             | <b>1.000*</b> | 0.991  | <b>0.999*</b>  | <b>0.999*</b>  | <b>0.999*</b>  | -0.839 | -0.991 | -0.991 | -0.991 |
|        |         | <i>p</i> |          |       |       |                |        |               | 0.018         | 0.088  | 0.021          | 0.029          | 0.032          | 0.367  | 0.084  | 0.084  | 0.085  |
|        | Ca      | <i>r</i> |          |       |       |                |        |               | 1             | 0.986  | <b>1.000**</b> | <b>1.000*</b>  | 0.997          | -0.854 | -0.995 | -0.995 | -0.995 |
|        |         | <i>p</i> |          |       |       |                |        |               |               | 0.106  | 0.004          | 0.011          | 0.050          | 0.349  | 0.066  | 0.066  | 0.067  |
|        | Mg      | <i>r</i> |          |       |       |                |        |               |               | 1      | 0.985          | 0.983          | 0.996          | -0.756 | -0.964 | -0.964 | -0.964 |
|        |         | <i>p</i> |          |       |       |                |        |               |               |        | 0.109          | 0.116          | 0.055          | 0.454  | 0.171  | 0.171  | 0.172  |
|        | Fe      | <i>r</i> |          |       |       |                |        |               |               |        | 1              | <b>1.000**</b> | 0.996          | -0.857 | -0.995 | -0.995 | -0.995 |
|        |         | <i>p</i> |          |       |       |                |        |               |               |        |                | 0.007          | 0.054          | 0.345  | 0.062  | 0.062  | 0.063  |
|        | Zn      | <i>r</i> |          |       |       |                |        |               |               |        |                |                | 1              | 0.995  | -0.862 | -0.996 | -0.996 |
|        |         | <i>p</i> |          |       |       |                |        |               |               |        |                |                |                | 0.061  | 0.338  | 0.055  | 0.055  |
|        | Cu      | <i>r</i> |          |       |       |                |        |               |               |        |                |                |                | 1      | -0.810 | -0.983 | -0.983 |
|        |         | <i>p</i> |          |       |       |                |        |               |               |        |                |                |                |        | 0.399  | 0.116  | 0.116  |
|        | EO      | <i>r</i> |          |       |       |                |        |               |               |        |                |                |                |        | 1      | 0.903  | 0.903  |
|        |         | <i>p</i> |          |       |       |                |        |               |               |        |                |                |                |        |        | 0.283  | 0.283  |
| Spring | Phenols | <i>r</i> | <b>1</b> | 0.933 | 0.797 | 0.602          | 0.255  | -0.122        | -0.263        | 0.279  | 0.292          | 0.273          | 0.454          | -0.257 | -0.263 | 0.544  | 0.263  |
| Plain  |         | <i>p</i> |          | 0.234 | 0.413 | 0.589          | 0.836  | 0.922         | 0.831         | 0.820  | 0.811          | 0.824          | 0.700          | 0.834  | 0.831  | 0.633  | 0.831  |
|        | FRAP    | <i>r</i> |          | 1     | 0.961 | 0.275          | 0.585  | 0.242         | 0.101         | -0.084 | -0.070         | -0.090         | 0.743          | 0.107  | 0.101  | 0.809  | -0.101 |
|        |         | <i>p</i> |          |       | 0.179 | 0.822          | 0.602  | 0.844         | 0.936         | 0.946  | 0.955          | 0.942          | 0.466          | 0.932  | 0.936  | 0.400  | 0.936  |

|      |          |   |        |        |        |        |                |                |                 |        |                |                 |        |                 |                 |
|------|----------|---|--------|--------|--------|--------|----------------|----------------|-----------------|--------|----------------|-----------------|--------|-----------------|-----------------|
| ABTS | <i>r</i> | 1 | -0.002 | 0.787  | 0.502  | 0.373  | -0.357         | -0.344         | -0.363          | 0.900  | 0.378          | 0.373           | 0.940  | -0.373          | 0.656           |
|      | <i>p</i> |   | 0.999  | 0.423  | 0.665  | 0.757  | 0.767          | 0.776          | 0.763           | 0.287  | 0.753          | 0.757           | 0.221  | 0.757           | 0.544           |
| N    | <i>r</i> |   | 1      | -0.619 | -0.866 | -0.929 | 0.935          | 0.940          | 0.932           | -0.438 | -0.926         | -0.929          | -0.342 | 0.929           | -0.756          |
|      | <i>p</i> |   |        | 0.575  | 0.333  | 0.242  | 0.231          | 0.222          | 0.235           | 0.711  | 0.246          | 0.242           | 0.778  | 0.242           | 0.454           |
| K    | <i>r</i> |   |        | 1      | 0.929  | 0.866  | -0.857         | -0.850         | -0.861          | 0.977  | 0.869          | 0.866           | 0.950  | -0.866          | 0.982           |
|      | <i>p</i> |   |        |        | 0.242  | 0.333  | 0.344          | 0.353          | 0.340           | 0.136  | 0.330          | 0.333           | 0.202  | 0.333           | 0.121           |
| P    | <i>r</i> |   |        |        | 1      | 0.990  | -0.987         | -0.985         | -0.988          | 0.829  | 0.991          | 0.990           | 0.766  | -0.990          | 0.982           |
|      | <i>p</i> |   |        |        |        | 0.091  | 0.102          | 0.111          | 0.098           | 0.378  | 0.088          | 0.091           | 0.445  | 0.091           | 0.121           |
| Na   | <i>r</i> |   |        |        |        | 1      | <b>-1.000*</b> | <b>-1.000*</b> | <b>-1.000**</b> | 0.741  | <b>1.000**</b> | <b>1.000**</b>  | 0.666  | <b>-1.000**</b> | 0.945           |
|      | <i>p</i> |   |        |        |        |        | 0.011          | 0.020          | 0.007           | 0.469  | 0.004          | 0.000           | 0.536  | 0.000           | 0.212           |
| Ca   | <i>r</i> |   |        |        |        |        | 1              | <b>1.000**</b> | <b>1.000**</b>  | -0.729 | <b>-1.000*</b> | <b>-1.000*</b>  | -0.653 | <b>1.000*</b>   | -0.939          |
|      | <i>p</i> |   |        |        |        |        |                | 0.009          | 0.004           | 0.480  | 0.014          | 0.011           | 0.547  | 0.011           | 0.223           |
| Mg   | <i>r</i> |   |        |        |        |        |                | 1              | <b>1.000*</b>   | -0.719 | <b>-0.999*</b> | <b>-1.000*</b>  | -0.643 | <b>1.000*</b>   | -0.934          |
|      | <i>p</i> |   |        |        |        |        |                |                | 0.013           | 0.489  | 0.023          | 0.020           | 0.555  | 0.020           | 0.232           |
| Fe   | <i>r</i> |   |        |        |        |        |                |                | 1               | -0.733 | <b>-1.000*</b> | <b>-1.000**</b> | -0.658 | <b>1.000**</b>  | -0.941          |
|      | <i>p</i> |   |        |        |        |        |                |                |                 | 0.476  | 0.010          | 0.007           | 0.543  | 0.007           | 0.219           |
| Zn   | <i>r</i> |   |        |        |        |        |                |                |                 | 1      | 0.744          | 0.741           | 0.995  | -0.741          | 0.920           |
|      | <i>p</i> |   |        |        |        |        |                |                |                 |        | 0.466          | 0.469           | 0.067  | 0.469           | 0.257           |
| Cu   | <i>r</i> |   |        |        |        |        |                |                |                 |        | 1              | <b>1.000**</b>  | 0.670  | <b>-1.000**</b> | 0.947           |
|      | <i>p</i> |   |        |        |        |        |                |                |                 |        |                | 0.004           | 0.532  | 0.004           | 0.209           |
| EO   | <i>r</i> |   |        |        |        |        |                |                |                 |        |                |                 | 1      | 0.666           | <b>-1.000**</b> |
|      | <i>p</i> |   |        |        |        |        |                |                |                 |        |                |                 |        | 0.536           | 0.000           |

Statistically significant correlations are shown in bold letter (\* for  $p < 0.05$ , \*\* for  $p < 0.01$ ).
